# Supplementary material for: Mechanistic insights into the full hydrogenation of 2,6-substituted pyridine catalyzed by the Lewis acid C6F5(CH2)2B(C6F5)2
Source: Royal Society of Chemistry journal article supplement (doi:10.1039/c5dt00978b), 2015-01-01
Supplement: c5dt00978b1.pdf [file c5dt00978b1.pdf]

## Supporting Information

### **Mechanistic Insights on the Full Hydrogenation of 2,6-substituted Pyridine Catalyzed by the Lewis Acid $C_6F_5(CH_2)_2B(C_6F_5)_2$**

*Jiyang Zhao<sup>†,‡</sup>, Guoqiang Wang<sup>†</sup>, Shuhua Li<sup>\*,†</sup>*

<sup>†</sup>School of Chemistry and Chemical Engineering, Key Laboratory of Mesoscopic Chemistry  
of Ministry of Education, Institute of Theoretical and Computational Chemistry, Nanjing  
University, Nanjing 210093, People's Republic of China.

<sup>‡</sup>Office of Science and Technology, Nanjing Xiaozhuang University, Nanjing 211171,  
People's Republic of China.

shuhua@nju.edu.cn

## Full representation of Ref. 17

Gaussian 09, Revision B.01, M. J. Frisch, G. W. Trucks, H. B. Schlegel, G. E. Scuseria, M. A. Robb, J. R. Cheeseman, G. Scalmani, V. Barone, B. Mennucci, G. A. Petersson, H. Nakatsuji, M. Caricato, X. Li, H. P. Hratchian, A. F. Izmaylov, J. Bloino, G. Zheng, J. L. Sonnenberg, M. Hada, M. Ehara, K. Toyota, R. Fukuda, J. Hasegawa, M. Ishida, T. Nakajima, Y. Honda, O. Kitao, H. Nakai, T. Vreven, J. A. Montgomery, Jr., J. E. Peralta, F. Ogliaro, M. Bearpark, J. J. Heyd, E. Brothers, K. N. Kudin, V. N. Staroverov, T. Keith, R. Kobayashi, J. Normand, K. Raghavachari, A. Rendell, J. C. Burant, S. S. Iyengar, J. Tomasi, M. Cossi, N. Rega, J. M. Millam, M. Klene, J. E. Knox, J. B. Cross, V. Bakken, C. Adamo, J. Jaramillo, R. Gomperts, R. E. Stratmann, O. Yazyev, A. J. Austin, R. Cammi, C. Pomelli, J. W. Ochterski, R. L. Martin, K. Morokuma, V. G. Zakrzewski, G. A. Voth, P. Salvador, J. J. Dannenberg, S. Dapprich, A. D. Daniels, O. Farkas, J. B. Foresman, J. V. Ortiz, J. Cioslowski, and D. J. Fox, Gaussian, Inc., Wallingford CT, 2010.

**Table S1.** Cartesian coordinates of all species.

|   |           |           |           |   |           |           |           |
|---|-----------|-----------|-----------|---|-----------|-----------|-----------|
| 1 |           |           |           | F | 0.449997  | 2.60215   | -0.000261 |
| B | -0.000079 | 1.394679  | 0.0006    |   |           |           |           |
| C | -1.372643 | 0.668189  | -0.057298 | 3 |           |           |           |
| C | -2.512129 | 1.308421  | 0.433345  | C | 3.563598  | -0.295268 | 0.776563  |
| C | -1.572245 | -0.584502 | -0.641561 | C | 2.325803  | -0.544265 | 1.341645  |
| C | -3.770154 | 0.733603  | 0.387599  | C | 1.575141  | -1.675151 | 1.025013  |
| C | -2.81764  | -1.179273 | -0.719223 | C | 2.160314  | -2.566118 | 0.122016  |
| C | -3.918235 | -0.515801 | -0.195063 | C | 3.400395  | -2.344174 | -0.450222 |
| C | 1.372583  | 0.668332  | 0.05804   | C | 4.103143  | -1.193027 | -0.130359 |
| C | 1.572516  | -0.584342 | 0.64222   | F | 1.499691  | -3.664562 | -0.239063 |
| C | 2.511804  | 1.308612  | -0.433149 | F | 3.908628  | -3.21052  | -1.3154   |
| C | 2.81798   | -1.17906  | 0.719284  | F | 5.272895  | -0.945567 | -0.693021 |
| C | 3.769869  | 0.733832  | -0.388045 | F | 4.201924  | 0.837209  | 1.053395  |
| C | 3.918284  | -0.515564 | 0.194549  | F | 1.841289  | 0.384968  | 2.168316  |
| F | -5.112481 | -1.077515 | -0.253792 | C | 0.2186    | -1.952463 | 1.51682   |
| F | 5.112562  | -1.077257 | 0.252622  | H | -0.534894 | -1.438624 | -1.158474 |
| F | 4.827899  | 1.360701  | -0.885595 | H | -0.148475 | -2.941345 | 1.266138  |
| F | 2.411675  | 2.50871   | -0.996577 | C | -0.595547 | -1.117154 | 2.169379  |
| F | 0.552831  | -1.244185 | 1.186508  | H | -0.322795 | -0.109776 | 2.451257  |
| F | 2.975859  | -2.365576 | 1.291213  | H | -1.583696 | -1.460905 | 2.450913  |
| F | -0.552271 | -1.244304 | -1.185358 | B | -0.9726   | -0.412738 | -0.761784 |
| F | -2.975191 | -2.365794 | -1.29123  | C | -2.511955 | -0.321564 | -0.522765 |
| F | -4.828468 | 1.360465  | 0.884548  | C | -3.216844 | -1.446189 | -0.097976 |
| F | -2.412347 | 2.508551  | 0.99676   | C | -3.268867 | 0.820854  | -0.774903 |
| H | -0.000155 | 2.577761  | 0.000914  | C | -4.58477  | -1.438989 | 0.109172  |
| 2 |           |           |           | C | -4.641126 | 0.858132  | -0.59974  |
| C | -1.240188 | 1.008825  | 0.000089  | C | -5.297412 | -0.277804 | -0.150041 |
| C | 0.110111  | 1.312719  | -0.000175 | C | 0.00998   | 0.783689  | -0.588672 |
| C | 1.106452  | 0.334268  | -0.000313 | C | 1.248334  | 0.76279   | -1.229089 |
| C | 0.663005  | -0.98874  | -0.000314 | C | -0.201664 | 1.847626  | 0.290458  |
| C | -0.681366 | -1.318347 | -0.000079 | C | 2.214352  | 1.73374   | -1.030574 |
| C | -1.63901  | -0.317223 | 0.000155  | C | 0.740992  | 2.833213  | 0.515283  |
| C | 2.514799  | 0.755645  | -0.000638 | C | 1.959095  | 2.770315  | -0.147692 |
| H | 2.648141  | 1.831246  | -0.002588 | F | -6.607038 | -0.25396  | 0.029542  |
| C | 3.596634  | -0.021802 | 0.001424  | F | 2.882181  | 3.684697  | 0.081094  |
| H | 3.556081  | -1.10091  | 0.003556  | F | 0.511997  | 3.811698  | 1.380534  |
| H | 4.576863  | 0.438099  | 0.000918  | F | -1.319647 | 1.90968   | 1.013526  |
| F | 1.532298  | -1.999002 | -0.000656 | F | 1.569132  | -0.244575 | -2.039818 |
| F | -1.058212 | -2.591224 | -0.000098 | F | 3.401593  | 1.637004  | -1.617917 |
| F | -2.926594 | -0.628179 | 0.000424  | F | -2.685324 | 1.927255  | -1.232479 |
| F | -2.149012 | 1.976199  | 0.000282  | F | -5.333552 | 1.959765  | -0.858645 |
|   |           |           |           | F | -5.218485 | -2.520838 | 0.544525  |

F -2.564898 -2.580569 0.162432

---

TS<sub>3/4</sub>

---

|   |           |           |           |
|---|-----------|-----------|-----------|
| C | 3.798842  | -0.648812 | 0.725517  |
| C | 2.493875  | -0.666183 | 1.190777  |
| C | 1.585596  | -1.637691 | 0.775146  |
| C | 2.055662  | -2.603395 | -0.115803 |
| C | 3.3549    | -2.613019 | -0.582562 |
| C | 4.230442  | -1.623667 | -0.159315 |
| F | 1.215609  | -3.528358 | -0.571139 |
| F | 3.761744  | -3.541281 | -1.433861 |
| F | 5.474033  | -1.611345 | -0.599819 |
| F | 4.63295   | 0.300046  | 1.122676  |
| F | 2.145303  | 0.299266  | 2.036604  |
| C | 0.152527  | -1.684058 | 1.141486  |
| H | -0.406577 | -1.226759 | -0.387672 |
| H | -0.312104 | -2.64757  | 0.975227  |
| C | -0.527768 | -0.768858 | 1.971727  |
| H | 0.007622  | 0.013172  | 2.484328  |
| H | -1.424646 | -1.133434 | 2.452526  |
| B | -0.858116 | -0.31344  | 0.331383  |
| C | -2.441881 | -0.369849 | 0.06456   |
| C | -3.187616 | -1.513315 | 0.318846  |
| C | -3.158439 | 0.703112  | -0.450286 |
| C | -4.548508 | -1.610765 | 0.096294  |
| C | -4.525818 | 0.648087  | -0.686272 |
| C | -5.2248   | -0.514022 | -0.413328 |
| C | 0.029361  | 0.971402  | -0.012809 |
| C | 1.027276  | 0.968103  | -0.974266 |
| C | -0.112317 | 2.149884  | 0.708653  |
| C | 1.864381  | 2.051532  | -1.197413 |
| C | 0.684407  | 3.260899  | 0.50456   |
| C | 1.685797  | 3.205636  | -0.454917 |
| F | -6.530129 | -0.580598 | -0.636465 |
| F | 2.469275  | 4.255139  | -0.656249 |
| F | 0.514828  | 4.36805   | 1.217561  |
| F | -1.049061 | 2.223038  | 1.659546  |
| F | 1.251455  | -0.128858 | -1.715558 |
| F | 2.832152  | 1.985908  | -2.106571 |
| F | -2.552321 | 1.855842  | -0.747491 |
| F | -5.166637 | 1.70321   | -1.175547 |
| F | -5.204309 | -2.735613 | 0.36073   |
| F | -2.571471 | -2.605372 | 0.813926  |

---

4

---

|   |           |           |           |
|---|-----------|-----------|-----------|
| C | -5.082138 | 0.963723  | -0.000843 |
| C | -3.714043 | 1.027375  | 0.208198  |
| C | -2.946933 | -0.110186 | 0.41254   |
| C | -3.604107 | -1.332029 | 0.383563  |
| C | -4.970072 | -1.427496 | 0.17564   |
| C | -5.710646 | -0.271389 | -0.015705 |
| F | -2.906558 | -2.455596 | 0.556763  |
| F | -5.572164 | -2.610567 | 0.157941  |
| F | -7.019213 | -0.347013 | -0.214972 |
| F | -5.79208  | 2.06999   | -0.186445 |
| F | -3.126551 | 2.226377  | 0.208511  |
| C | -1.457814 | -0.032695 | 0.607154  |
| H | -1.213047 | 0.920532  | 1.079988  |
| H | -1.152692 | -0.833724 | 1.282443  |
| C | -0.711709 | -0.157767 | -0.750748 |
| H | -1.046154 | 0.663237  | -1.388052 |
| H | -1.001706 | -1.097478 | -1.221857 |
| B | 0.829785  | -0.048766 | -0.472138 |
| C | 1.743543  | -1.316223 | -0.347895 |
| C | 1.225648  | -2.581664 | -0.059596 |
| C | 3.126279  | -1.264931 | -0.551734 |
| C | 2.01193   | -3.717407 | 0.029289  |
| C | 3.939068  | -2.38167  | -0.487469 |
| C | 3.375679  | -3.613688 | -0.192181 |
| C | 1.431876  | 1.382603  | -0.202034 |
| C | 2.270288  | 1.627774  | 0.883305  |
| C | 1.117072  | 2.487238  | -0.989761 |
| C | 2.75934   | 2.884763  | 1.186797  |
| C | 1.603305  | 3.757398  | -0.728254 |
| C | 2.423151  | 3.954855  | 0.370667  |
| F | 4.140404  | -4.687492 | -0.118156 |
| F | 2.890655  | 5.161802  | 0.639965  |
| F | 1.297339  | 4.778595  | -1.517547 |
| F | 0.356605  | 2.347154  | -2.077949 |
| F | 2.62461   | 0.624886  | 1.69094   |
| F | 3.543647  | 3.077338  | 2.239046  |
| F | 3.726044  | -0.112358 | -0.844717 |
| F | 5.244402  | -2.28826  | -0.701817 |
| F | 1.47737   | -4.894927 | 0.322485  |
| F | -0.074913 | -2.743287 | 0.181794  |

---

5

---

C -0.416054 0.34149 -0.037982

|       |           |           |           |   |           |           |           |
|-------|-----------|-----------|-----------|---|-----------|-----------|-----------|
| C     | -0.945132 | 1.619919  | -0.243717 | H | 0.210457  | -3.767632 | 0.567103  |
| C     | -2.321751 | 1.773892  | -0.258381 | C | 3.152207  | -2.372703 | 1.502807  |
| C     | -3.129303 | 0.65979   | -0.07806  | H | 3.359995  | -0.71168  | 2.85286   |
| C     | -2.522868 | -0.583199 | 0.100651  | H | 2.630722  | -3.99319  | 0.191527  |
| N     | -1.197274 | -0.730559 | 0.11762   | H | 4.217404  | -2.474939 | 1.328021  |
| H     | -2.761927 | 2.751437  | -0.419038 | C | 5.212289  | 1.758751  | -0.085502 |
| H     | -0.292258 | 2.465255  | -0.41503  | C | 3.910036  | 1.874434  | -0.547034 |
| H     | -4.208917 | 0.74352   | -0.083828 | C | 3.21296   | 0.794459  | -1.067779 |
| C     | -3.331463 | -1.836423 | 0.293873  | C | 3.875762  | -0.424665 | -1.104784 |
| H     | -3.140706 | -2.250431 | 1.286197  | C | 5.17008   | -0.573225 | -0.637739 |
| H     | -4.399934 | -1.647181 | 0.190028  | C | 5.842081  | 0.525547  | -0.12644  |
| H     | -3.028129 | -2.58796  | -0.436848 | F | 3.246802  | -1.50184  | -1.57545  |
| C     | 1.05247   | 0.103738  | -0.008766 | F | 5.761775  | -1.765335 | -0.650502 |
| C     | 1.553246  | -1.159916 | -0.33062  | F | 7.082935  | 0.395823  | 0.325761  |
| C     | 1.949389  | 1.115357  | 0.341066  | F | 5.854488  | 2.813748  | 0.403566  |
| C     | 2.920495  | -1.398154 | -0.324266 | F | 3.317283  | 3.06793   | -0.465546 |
| H     | 0.850916  | -1.944529 | -0.581077 | C | 1.759829  | 0.891332  | -1.448016 |
| C     | 3.317808  | 0.874384  | 0.353013  | H | 1.51302   | 1.929105  | -1.678179 |
| H     | 1.580522  | 2.090974  | 0.634969  | H | 1.581159  | 0.289917  | -2.341639 |
| C     | 3.808174  | -0.381552 | 0.014642  | C | 0.91177   | 0.361619  | -0.263943 |
| H     | 3.295624  | -2.380844 | -0.584556 | H | 1.153534  | 0.963169  | 0.615176  |
| H     | 4.000436  | 1.66694   | 0.635392  | H | 1.238608  | -0.656511 | -0.06149  |
| H     | 4.875223  | -0.569219 | 0.02174   | B | -0.630321 | 0.444725  | -0.545087 |
| <hr/> |           |           |           | C | -1.442932 | -0.822408 | -1.005338 |
| 6     |           |           |           | C | -0.806502 | -1.967242 | -1.487845 |
| C     | -1.057635 | -1.883181 | 2.087967  | C | -2.816364 | -0.95472  | -0.784578 |
| C     | -1.958764 | -2.946385 | 2.070049  | C | -1.461326 | -3.172247 | -1.67872  |
| C     | -3.312045 | -2.672592 | 2.230196  | C | -3.500565 | -2.14286  | -0.959847 |
| C     | -3.71684  | -1.362271 | 2.422493  | C | -2.814933 | -3.262109 | -1.40192  |
| C     | -2.750217 | -0.351622 | 2.439167  | C | -1.346165 | 1.844737  | -0.426062 |
| N     | -1.454711 | -0.610473 | 2.254996  | C | -2.247848 | 2.284695  | -1.393214 |
| H     | -4.039993 | -3.475901 | 2.212003  | C | -1.09694  | 2.731506  | 0.618871  |
| H     | -1.601919 | -3.96314  | 1.96509   | C | -2.876668 | 3.514492  | -1.335957 |
| H     | -4.762457 | -1.112251 | 2.55307   | C | -1.728071 | 3.961052  | 0.722838  |
| C     | -3.145405 | 1.086299  | 2.637288  | C | -2.615199 | 4.355971  | -0.264471 |
| H     | -3.934219 | 1.175159  | 3.385843  | F | -3.449846 | -4.413715 | -1.547922 |
| H     | -2.28053  | 1.668894  | 2.952605  | F | -3.214011 | 5.53331   | -0.187439 |
| H     | -3.526781 | 1.500099  | 1.698825  | F | -1.497052 | 4.754698  | 1.762018  |
| C     | 0.402146  | -2.098598 | 1.920776  | F | -0.274008 | 2.40608   | 1.616083  |
| C     | 1.302918  | -1.242553 | 2.559457  | F | -2.534705 | 1.504557  | -2.437885 |
| C     | 0.895182  | -3.105539 | 1.087006  | F | -3.722354 | 3.895878  | -2.285478 |
| C     | 2.669113  | -1.382257 | 2.354717  | F | -3.540293 | 0.074631  | -0.341821 |
| H     | 0.912687  | -0.45472  | 3.192233  | F | -4.792813 | -2.234069 | -0.666365 |
| C     | 2.26184   | -3.233826 | 0.869928  | F | -0.797549 | -4.245067 | -2.096925 |

---

|   |          |           |          |
|---|----------|-----------|----------|
| F | 0.488253 | -1.947745 | -1.79863 |
|---|----------|-----------|----------|

---

6a

|   |           |           |           |
|---|-----------|-----------|-----------|
| B | -0.856727 | 0.009127  | 0.133911  |
| C | -2.361792 | -0.538221 | -0.251562 |
| C | -3.520676 | -0.429384 | 0.510353  |
| C | -2.569559 | -1.135191 | -1.49259  |
| C | -4.77361  | -0.85721  | 0.090927  |
| C | -3.79377  | -1.586396 | -1.952239 |
| C | -4.91386  | -1.443917 | -1.151362 |
| C | 0.269971  | -1.153195 | 0.445619  |
| C | 0.140424  | -2.517169 | 0.217239  |
| C | 1.495557  | -0.775254 | 0.984041  |
| C | 1.13906   | -3.440198 | 0.49318   |
| C | 2.517511  | -1.660663 | 1.284276  |
| C | 2.341448  | -3.009498 | 1.026417  |
| F | -6.101659 | -1.861896 | -1.570542 |
| F | 3.310803  | -3.874744 | 1.287265  |
| F | 3.677897  | -1.219952 | 1.767016  |
| F | 1.743457  | 0.522696  | 1.244837  |
| F | -1.016633 | -3.029489 | -0.223039 |
| F | 0.947043  | -4.735087 | 0.262237  |
| F | -1.534289 | -1.32171  | -2.319319 |
| F | -3.902537 | -2.15497  | -3.148556 |
| F | -5.835914 | -0.700078 | 0.8776    |
| F | -3.509705 | 0.135676  | 1.73658   |
| C | -0.921554 | 2.189596  | 1.699021  |
| C | -0.536096 | 2.823111  | 2.873622  |
| C | -0.278897 | 2.075757  | 4.008817  |
| C | -0.521812 | 0.716682  | 3.95885   |
| C | -0.88992  | 0.111661  | 2.763496  |
| N | -0.972495 | 0.832309  | 1.614391  |
| H | 0.039213  | 2.551739  | 4.928368  |
| H | -0.488344 | 3.90353   | 2.881906  |
| H | -0.437485 | 0.097129  | 4.842475  |
| C | -1.245049 | -1.351001 | 2.821129  |
| H | -1.741272 | -1.714533 | 1.927777  |
| H | -0.356188 | -1.959524 | 3.002581  |
| H | -1.924739 | -1.48273  | 3.665613  |
| C | -1.387171 | 3.052533  | 0.584432  |
| C | -2.673259 | 2.884029  | 0.074365  |
| C | -0.580397 | 4.086048  | 0.106146  |
| C | -3.132999 | 3.721245  | -0.935896 |
| H | -3.314493 | 2.113724  | 0.48205   |

|   |           |           |           |
|---|-----------|-----------|-----------|
| C | -1.037359 | 4.909875  | -0.911551 |
| H | 0.425496  | 4.205983  | 0.494152  |
| C | -2.313418 | 4.725401  | -1.437452 |
| H | -4.133385 | 3.587416  | -1.329116 |
| H | -0.393979 | 5.689001  | -1.301074 |
| H | -2.669014 | 5.368815  | -2.233012 |
| C | -0.234389 | 0.994578  | -1.026791 |
| H | -1.042183 | 1.495965  | -1.565521 |
| H | 0.322925  | 1.79335   | -0.5423   |
| C | 0.728725  | 0.392215  | -2.090857 |
| H | 0.570854  | 0.919062  | -3.035611 |
| H | 0.531989  | -0.659277 | -2.281521 |
| C | 2.185021  | 0.533343  | -1.724742 |
| C | 2.77008   | 1.772864  | -1.496597 |
| C | 3.008129  | -0.570566 | -1.557728 |
| C | 4.078043  | 1.911939  | -1.066111 |
| C | 4.314323  | -0.468407 | -1.106647 |
| C | 4.854737  | 0.782116  | -0.863163 |
| F | 2.526129  | -1.800036 | -1.76687  |
| F | 5.032074  | -1.564574 | -0.885761 |
| F | 6.105375  | 0.901312  | -0.436024 |
| F | 4.592153  | 3.118552  | -0.841851 |
| F | 2.049921  | 2.888547  | -1.668785 |

---

7

|   |           |           |           |
|---|-----------|-----------|-----------|
| C | 3.171309  | -2.413461 | -1.770693 |
| C | 4.240613  | -3.011181 | -1.100766 |
| C | 5.147987  | -2.201726 | -0.43337  |
| C | 4.970594  | -0.825866 | -0.454204 |
| C | 3.881592  | -0.300849 | -1.151074 |
| N | 3.006653  | -1.088156 | -1.793047 |
| H | 5.982993  | -2.638345 | 0.101744  |
| H | 4.342638  | -4.090077 | -1.096233 |
| H | 5.668744  | -0.165994 | 0.043277  |
| H | 0.35629   | 0.07787   | -1.824258 |
| H | 1.017509  | -0.246517 | -1.593437 |
| C | -5.944915 | 0.795039  | -0.128826 |
| C | -4.59798  | 0.694604  | 0.174368  |
| C | -3.93753  | -0.525287 | 0.218734  |
| C | -4.682526 | -1.658315 | -0.072353 |
| C | -6.032933 | -1.590062 | -0.378823 |
| C | -6.66466  | -0.357461 | -0.405623 |
| F | -4.096131 | -2.856769 | -0.061629 |
| F | -6.722806 | -2.693146 | -0.646947 |

|   |           |           |           |                   |           |           |           |
|---|-----------|-----------|-----------|-------------------|-----------|-----------|-----------|
| F | -7.956067 | -0.278822 | -0.699239 | H                 | 2.478121  | 3.528064  | -3.365935 |
| F | -6.549319 | 1.97738   | -0.157868 | H                 | 4.034748  | 4.007347  | 0.599559  |
| F | -3.916506 | 1.815449  | 0.427302  | H                 | 3.101447  | 4.997475  | -1.473047 |
| C | -2.466642 | -0.589893 | 0.523365  |                   |           |           |           |
| H | -2.242619 | 0.143456  | 1.30324   |                   |           |           |           |
| H | -2.228483 | -1.577071 | 0.922029  | TS <sub>7/8</sub> |           |           |           |
| C | -1.615492 | -0.310179 | -0.734328 | C                 | 2.538419  | -2.386349 | -1.991993 |
| H | -1.980832 | 0.609367  | -1.201705 | C                 | 3.546889  | -3.200866 | -1.489415 |
| H | -1.761267 | -1.123491 | -1.445845 | C                 | 4.638938  | -2.611121 | -0.864022 |
| B | -0.101462 | -0.097575 | -0.262574 | C                 | 4.713578  | -1.230024 | -0.777413 |
| C | 0.711525  | -1.310547 | 0.40585   | C                 | 3.671471  | -0.46558  | -1.301123 |
| C | 0.353483  | -2.638793 | 0.184274  | N                 | 2.610553  | -1.051192 | -1.87809  |
| C | 1.874573  | -1.141759 | 1.160095  | H                 | 5.428255  | -3.226723 | -0.449014 |
| C | 1.076176  | -3.719424 | 0.6649    | H                 | 3.462453  | -4.277266 | -1.57557  |
| C | 2.612572  | -2.193735 | 1.671054  | H                 | 5.562366  | -0.739941 | -0.319715 |
| C | 2.21568   | -3.494086 | 1.412983  | H                 | 0.452499  | -0.029473 | -1.647379 |
| C | 0.164134  | 1.406736  | 0.220914  | H                 | 1.248887  | -0.367408 | -1.654496 |
| C | 0.264837  | 1.761476  | 1.55924   | C                 | -5.87006  | 1.199228  | -0.158806 |
| C | 0.160362  | 2.463253  | -0.681047 | C                 | -4.527033 | 1.068411  | 0.153193  |
| C | 0.435402  | 3.069321  | 1.980528  | C                 | -3.899335 | -0.167478 | 0.221176  |
| C | 0.330014  | 3.78292   | -0.302834 | C                 | -4.675149 | -1.283755 | -0.05662  |
| C | 0.484347  | 4.08427   | 1.03851   | C                 | -6.02101  | -1.185119 | -0.372012 |
| F | 2.951218  | -4.510614 | 1.837081  | C                 | -6.61959  | 0.063344  | -0.421281 |
| F | 0.672103  | 5.341079  | 1.420367  | F                 | -4.120762 | -2.497401 | -0.02465  |
| F | 0.357535  | 4.754171  | -1.210462 | F                 | -6.739573 | -2.273809 | -0.626604 |
| F | -0.021545 | 2.224837  | -1.989454 | F                 | -7.9079   | 0.171604  | -0.722814 |
| F | 0.173322  | 0.820595  | 2.508089  | F                 | -6.443293 | 2.397134  | -0.20759  |
| F | 0.54666   | 3.360997  | 3.272426  | F                 | -3.821856 | 2.177066  | 0.39247   |
| F | 2.378753  | 0.072253  | 1.388103  | C                 | -2.432076 | -0.279562 | 0.531417  |
| F | 3.731245  | -1.970158 | 2.353039  | H                 | -2.165061 | 0.504889  | 1.243975  |
| F | 0.713734  | -4.963196 | 0.364175  | H                 | -2.247344 | -1.240253 | 1.0158    |
| F | -0.707736 | -2.948148 | -0.568956 | C                 | -1.570175 | -0.152592 | -0.739434 |
| C | 2.160056  | -3.239616 | -2.518864 | H                 | -1.828924 | 0.785458  | -1.241483 |
| H | 1.204618  | -2.71598  | -2.568957 | H                 | -1.826995 | -0.964667 | -1.422378 |
| H | 2.501115  | -3.409636 | -3.543642 | B                 | -0.008033 | -0.112079 | -0.33465  |
| H | 2.009704  | -4.213052 | -2.047951 | C                 | 0.627637  | -1.415912 | 0.39571   |
| C | 3.643442  | 1.164725  | -1.220793 | C                 | 0.088328  | -2.691273 | 0.248007  |
| C | 3.092605  | 1.727252  | -2.374144 | C                 | 1.818432  | -1.381943 | 1.121473  |
| C | 3.976085  | 1.999662  | -0.149666 | C                 | 0.676658  | -3.842314 | 0.753608  |
| C | 2.904465  | 3.101518  | -2.466063 | C                 | 2.436258  | -2.503244 | 1.645769  |
| H | 2.827189  | 1.077342  | -3.1998   | C                 | 1.861598  | -3.748551 | 1.458383  |
| C | 3.781508  | 3.37116   | -0.240635 | C                 | 0.381629  | 1.342752  | 0.241262  |
| H | 4.359224  | 1.568662  | 0.767745  | C                 | 0.506776  | 1.629841  | 1.592814  |
| C | 3.255893  | 3.927365  | -1.403513 | C                 | 0.484662  | 2.434351  | -0.611006 |
|   |           |           |           | C                 | 0.795736  | 2.896105  | 2.074568  |

|   |           |           |           |
|---|-----------|-----------|-----------|
| C | 0.768234  | 3.716464  | -0.173153 |
| C | 0.941936  | 3.943915  | 1.180584  |
| F | 2.460817  | -4.838734 | 1.918837  |
| F | 1.240845  | 5.162147  | 1.618076  |
| F | 0.887441  | 4.723899  | -1.035627 |
| F | 0.30077   | 2.270175  | -1.931022 |
| F | 0.333981  | 0.660148  | 2.502256  |
| F | 0.929967  | 3.116072  | 3.379735  |
| F | 2.476749  | -0.230685 | 1.304053  |
| F | 3.603476  | -2.402032 | 2.277143  |
| F | 0.129631  | -5.033762 | 0.528602  |
| F | -1.032994 | -2.889225 | -0.457082 |
| C | 1.33163   | -2.947247 | -2.688796 |
| H | 0.444388  | -2.343543 | -2.489324 |
| H | 1.496795  | -2.947396 | -3.769258 |
| H | 1.13436   | -3.971623 | -2.370346 |
| C | 3.686725  | 1.015076  | -1.254601 |
| C | 3.219278  | 1.745607  | -2.348089 |
| C | 4.184878  | 1.690683  | -0.136792 |
| C | 3.26383   | 3.134214  | -2.331827 |
| H | 2.828781  | 1.218836  | -3.211171 |
| C | 4.21917   | 3.078048  | -0.120401 |
| H | 4.506749  | 1.127268  | 0.731202  |
| C | 3.765976  | 3.80161   | -1.220428 |
| H | 2.894161  | 3.695167  | -3.181192 |
| H | 4.589052  | 3.597096  | 0.755788  |
| H | 3.784745  | 4.884615  | -1.202104 |

---

8

|   |           |           |           |
|---|-----------|-----------|-----------|
| C | 2.136588  | 2.403212  | 2.023951  |
| C | 2.331629  | 3.560216  | 1.287129  |
| C | 3.148175  | 3.529378  | 0.164738  |
| C | 3.803528  | 2.358198  | -0.197112 |
| C | 3.611512  | 1.212649  | 0.556463  |
| N | 2.779785  | 1.286562  | 1.624044  |
| H | 3.28027   | 4.425251  | -0.431664 |
| H | 1.816862  | 4.463903  | 1.586122  |
| H | 4.461341  | 2.318858  | -1.054013 |
| H | 0.207134  | 0.258583  | 1.93468   |
| H | 2.543752  | 0.411103  | 2.10023   |
| C | -5.927305 | -2.19991  | 0.057208  |
| C | -4.564959 | -2.084115 | -0.172477 |
| C | -3.925324 | -0.854685 | -0.226283 |
| C | -4.715543 | 0.26978   | -0.027049 |

|   |           |           |           |
|---|-----------|-----------|-----------|
| C | -6.078014 | 0.187566  | 0.204     |
| C | -6.686295 | -1.057296 | 0.244989  |
| F | -4.150678 | 1.481205  | -0.056557 |
| F | -6.807331 | 1.285816  | 0.384131  |
| F | -7.994109 | -1.152437 | 0.464669  |
| F | -6.510049 | -3.395674 | 0.096032  |
| F | -3.862778 | -3.20745  | -0.345577 |
| C | -2.441051 | -0.726185 | -0.433269 |
| H | -2.085687 | -1.609332 | -0.962884 |
| H | -2.256878 | 0.132883  | -1.08462  |
| C | -1.694904 | -0.544437 | 0.90233   |
| H | -1.72824  | -1.493838 | 1.449564  |
| H | -2.257231 | 0.170961  | 1.50852   |
| B | -0.141591 | -0.031145 | 0.808176  |
| C | -0.022044 | 1.358783  | -0.071766 |
| C | -0.780546 | 2.464892  | 0.316063  |
| C | 0.811997  | 1.616152  | -1.150981 |
| C | -0.732108 | 3.7068    | -0.298188 |
| C | 0.900235  | 2.841089  | -1.79777  |
| C | 0.121481  | 3.899298  | -1.371944 |
| C | 0.833276  | -1.250847 | 0.303317  |
| C | 0.787211  | -1.804862 | -0.972418 |
| C | 1.689276  | -1.909797 | 1.170652  |
| C | 1.529898  | -2.905081 | -1.365447 |
| C | 2.429918  | -3.035633 | 0.841909  |
| C | 2.356713  | -3.529974 | -0.444988 |
| F | 0.22615   | 5.093383  | -1.951736 |
| F | 3.109672  | -4.566298 | -0.810376 |
| F | 3.229773  | -3.619632 | 1.736638  |
| F | 1.906259  | -1.431115 | 2.428275  |
| F | 0.009335  | -1.248193 | -1.911828 |
| F | 1.476259  | -3.364365 | -2.614956 |
| F | 1.684357  | 0.68977   | -1.597571 |
| F | 1.797381  | 3.026867  | -2.771206 |
| F | -1.463868 | 4.723649  | 0.153482  |
| F | -1.584061 | 2.386399  | 1.389603  |
| C | 1.245765  | 2.333212  | 3.220453  |
| H | 0.201454  | 2.362358  | 2.899275  |
| H | 1.396005  | 1.410329  | 3.779437  |
| H | 1.440712  | 3.188784  | 3.868583  |
| C | 4.285329  | -0.069379 | 0.289824  |
| C | 4.857267  | -0.789156 | 1.342816  |
| C | 4.375973  | -0.549112 | -1.018861 |
| C | 5.515867  | -1.983111 | 1.085196  |



|   |          |           |           |
|---|----------|-----------|-----------|
| H | 4.807864 | -0.408412 | 2.357285  |
| C | 5.016383 | -1.756436 | -1.263065 |
| H | 3.90208  | -0.003165 | -1.825169 |
| C | 5.586622 | -2.472331 | -0.214781 |
| H | 5.955843 | -2.541046 | 1.901704  |
| H | 5.053577 | -2.148636 | -2.272095 |
| H | 6.074504 | -3.419365 | -0.409195 |

---

9

|   |           |           |           |
|---|-----------|-----------|-----------|
| C | 0.379384  | -2.471738 | 2.737706  |
| C | 0.470432  | -1.698128 | 3.88114   |
| C | 1.590093  | -0.902965 | 4.083986  |
| C | 2.615043  | -0.874629 | 3.151491  |
| C | 2.509799  | -1.644967 | 2.005228  |
| N | 1.413396  | -2.427001 | 1.872636  |
| H | 1.660067  | -0.290582 | 4.97479   |
| H | -0.345158 | -1.716298 | 4.590885  |
| H | 3.4877    | -0.25301  | 3.28889   |
| H | 0.543062  | 0.121909  | 1.482554  |
| H | 1.304139  | -2.929524 | 0.995009  |
| C | -5.529167 | -1.521165 | 0.298217  |
| C | -4.198331 | -1.304232 | -0.011286 |
| C | -3.743095 | -0.128916 | -0.594486 |
| C | -4.700983 | 0.840442  | -0.857269 |
| C | -6.044155 | 0.652582  | -0.564023 |
| C | -6.459748 | -0.533401 | 0.017095  |
| F | -4.342213 | 2.000316  | -1.408578 |
| F | -6.935655 | 1.601106  | -0.835112 |
| F | -7.742923 | -0.72296  | 0.30761   |
| F | -5.919989 | -2.663437 | 0.860742  |
| F | -3.322542 | -2.280168 | 0.278036  |
| C | -2.275819 | 0.088061  | -0.855308 |
| H | -1.885431 | -0.812967 | -1.332847 |
| H | -2.156941 | 0.910336  | -1.558104 |
| C | -1.522031 | 0.371313  | 0.458294  |
| H | -1.770521 | -0.441997 | 1.150608  |
| H | -1.955934 | 1.274605  | 0.9041    |
| B | 0.116488  | 0.539605  | 0.422292  |
| C | 0.600476  | 2.106926  | 0.390789  |
| C | 0.057245  | 3.067679  | -0.449439 |
| C | 1.596524  | 2.584796  | 1.228515  |
| C | 0.45373   | 4.395482  | -0.469593 |
| C | 2.036696  | 3.898555  | 1.245513  |
| C | 1.454614  | 4.816203  | 0.389864  |

|   |           |           |           |
|---|-----------|-----------|-----------|
| C | 0.846321  | -0.34495  | -0.765348 |
| C | 1.892065  | 0.072263  | -1.583162 |
| C | 0.513478  | -1.680689 | -0.95159  |
| C | 2.549817  | -0.755317 | -2.484881 |
| C | 1.144437  | -2.552296 | -1.82256  |
| C | 2.18294   | -2.081728 | -2.604631 |
| F | 1.854884  | 6.085788  | 0.390134  |
| F | 2.857081  | -2.90358  | -3.405372 |
| F | 0.808037  | -3.846654 | -1.856595 |
| F | -0.443428 | -2.253711 | -0.174794 |
| F | 2.395838  | 1.311006  | -1.494381 |
| F | 3.58293   | -0.297278 | -3.191259 |
| F | 2.242995  | 1.752105  | 2.082659  |
| F | 3.011401  | 4.28464   | 2.07358   |
| F | -0.109444 | 5.268447  | -1.303357 |
| F | -0.895717 | 2.722172  | -1.329802 |
| C | -0.802189 | -3.322414 | 2.403102  |
| H | -1.240339 | -3.721457 | 3.317022  |
| H | -1.551423 | -2.718892 | 1.883518  |
| H | -0.529949 | -4.147475 | 1.744618  |
| C | 3.517465  | -1.663593 | 0.932352  |
| C | 3.843828  | -2.851455 | 0.273234  |
| C | 4.147417  | -0.467731 | 0.572247  |
| C | 4.79625   | -2.844086 | -0.738195 |
| H | 3.381623  | -3.789703 | 0.565095  |
| C | 5.094053  | -0.468007 | -0.441587 |
| H | 3.848724  | 0.460614  | 1.046508  |
| C | 5.419708  | -1.653399 | -1.095626 |
| H | 5.04493   | -3.765009 | -1.250368 |
| H | 5.554048  | 0.46427   | -0.743762 |
| H | 6.146098  | -1.644897 | -1.898766 |

---

TS<sub>9/10</sub>

|   |           |           |          |
|---|-----------|-----------|----------|
| C | 0.694954  | -2.485305 | 2.279081 |
| C | 0.291273  | -1.301345 | 2.817502 |
| C | 1.07959   | -0.128176 | 2.615204 |
| C | 2.418791  | -0.310522 | 2.171057 |
| C | 2.796383  | -1.505051 | 1.625972 |
| N | 1.916045  | -2.552649 | 1.669319 |
| H | 0.84759   | 0.764259  | 3.184754 |
| H | -0.669258 | -1.243281 | 3.309602 |
| H | 3.112129  | 0.516054  | 2.187656 |
| H | 0.399144  | 0.564685  | 1.369667 |
| H | 2.136851  | -3.383769 | 1.13475  |

|   |           |           |           |
|---|-----------|-----------|-----------|
| C | -4.956027 | -2.689659 | 0.203469  |
| C | -3.748741 | -2.096233 | -0.119032 |
| C | -3.662687 | -0.826807 | -0.676848 |
| C | -4.862715 | -0.166948 | -0.903296 |
| C | -6.089689 | -0.737662 | -0.596824 |
| C | -6.136063 | -2.00421  | -0.039761 |
| F | -4.861002 | 1.056513  | -1.432842 |
| F | -7.220036 | -0.078883 | -0.831307 |
| F | -7.304034 | -2.559731 | 0.263176  |
| F | -4.991677 | -3.904755 | 0.746504  |
| F | -2.627123 | -2.785834 | 0.133985  |
| C | -2.326348 | -0.186887 | -0.949601 |
| H | -1.708383 | -0.901579 | -1.497264 |
| H | -2.474061 | 0.683654  | -1.58722  |
| C | -1.631165 | 0.217387  | 0.365029  |
| H | -1.553653 | -0.686875 | 0.9809    |
| H | -2.294746 | 0.90106   | 0.905068  |
| B | -0.167505 | 0.891014  | 0.235781  |
| C | -0.120364 | 2.508859  | 0.314673  |
| C | -1.142904 | 3.341958  | -0.115202 |
| C | 0.958772  | 3.163815  | 0.893376  |
| C | -1.106435 | 4.724088  | 0.015916  |
| C | 1.042731  | 4.533953  | 1.048225  |
| C | -0.006683 | 5.323066  | 0.603289  |
| C | 0.890075  | 0.193089  | -0.787495 |
| C | 1.926603  | 0.848382  | -1.452774 |
| C | 0.93858   | -1.192708 | -0.924066 |
| C | 2.932208  | 0.193932  | -2.154158 |
| C | 1.933167  | -1.88658  | -1.590153 |
| C | 2.948477  | -1.1866   | -2.215232 |
| F | 0.047733  | 6.643802  | 0.739732  |
| F | 3.949091  | -1.825627 | -2.808244 |
| F | 1.957195  | -3.224596 | -1.557676 |
| F | 0.016861  | -1.972216 | -0.326725 |
| F | 2.032968  | 2.180672  | -1.428583 |
| F | 3.933224  | 0.8827    | -2.700539 |
| F | 2.013568  | 2.441582  | 1.327538  |
| F | 2.108197  | 5.101225  | 1.612553  |
| F | -2.114253 | 5.476549  | -0.418876 |
| F | -2.234461 | 2.832629  | -0.704837 |
| C | -0.128251 | -3.731929 | 2.249388  |
| H | -1.059014 | -3.585125 | 2.792896  |
| H | -0.377784 | -3.971074 | 1.21203   |
| H | 0.413114  | -4.573497 | 2.687674  |

|   |          |           |           |
|---|----------|-----------|-----------|
| C | 4.091542 | -1.731027 | 0.954422  |
| C | 4.659332 | -3.005462 | 0.878576  |
| C | 4.733843 | -0.660022 | 0.322794  |
| C | 5.839063 | -3.207687 | 0.174175  |
| H | 4.202268 | -3.842835 | 1.395028  |
| C | 5.909927 | -0.866316 | -0.383018 |
| H | 4.286854 | 0.327349  | 0.346314  |
| C | 6.462654 | -2.140763 | -0.461924 |
| H | 6.271485 | -4.199219 | 0.124323  |
| H | 6.381641 | -0.033665 | -0.889918 |
| H | 7.375418 | -2.302709 | -1.021733 |

---

10

|   |           |           |           |
|---|-----------|-----------|-----------|
| C | 3.315376  | 1.216021  | 1.44257   |
| C | 3.227409  | 0.073954  | 2.129137  |
| C | 2.010416  | -0.313111 | 2.930377  |
| C | 0.891674  | 0.673769  | 2.708801  |
| C | 1.043357  | 1.80852   | 2.009412  |
| N | 2.279131  | 2.160696  | 1.451967  |
| H | 2.255949  | -0.367244 | 3.999691  |
| H | 4.091385  | -0.579775 | 2.158193  |
| H | -0.055768 | 0.491627  | 3.201366  |
| H | 1.685487  | -1.329304 | 2.660999  |
| H | 2.223482  | 2.7317    | 0.618843  |
| C | 4.655604  | -1.029062 | -1.225332 |
| C | 3.329401  | -1.119712 | -1.615644 |
| C | 2.44114   | -1.994462 | -1.007598 |
| C | 2.946296  | -2.793179 | 0.010071  |
| C | 4.262893  | -2.718187 | 0.426745  |
| C | 5.120155  | -1.824922 | -0.194011 |
| F | 2.134315  | -3.648577 | 0.638967  |
| F | 4.698719  | -3.455051 | 1.442878  |
| F | 6.371687  | -1.694846 | 0.232065  |
| F | 5.472238  | -0.155062 | -1.805787 |
| F | 2.918112  | -0.317141 | -2.600446 |
| C | 0.983028  | -2.038901 | -1.380438 |
| H | 0.823616  | -1.334793 | -2.197471 |
| H | 0.730189  | -3.030725 | -1.762318 |
| C | 0.064266  | -1.728058 | -0.169264 |
| H | 0.619461  | -1.09801  | 0.539989  |
| H | -0.165643 | -2.655906 | 0.353812  |
| B | -1.236322 | -0.920055 | -0.508877 |
| C | -2.614624 | -1.609557 | -0.168731 |
| C | -2.833211 | -2.920257 | -0.578597 |

|   |           |           |           |
|---|-----------|-----------|-----------|
| C | -3.618332 | -1.034933 | 0.600545  |
| C | -3.985147 | -3.62286  | -0.268813 |
| C | -4.773941 | -1.709386 | 0.950652  |
| C | -4.957399 | -3.010354 | 0.506057  |
| C | -1.168943 | 0.540193  | -1.073877 |
| C | -2.304621 | 1.267316  | -1.456881 |
| C | 0.028274  | 1.265633  | -1.100454 |
| C | -2.273938 | 2.614285  | -1.764176 |
| C | 0.09193   | 2.61303   | -1.404661 |
| C | -1.06773  | 3.296221  | -1.722452 |
| F | -6.06221  | -3.666348 | 0.822321  |
| F | -1.026662 | 4.586414  | -1.992931 |
| F | 1.255423  | 3.261335  | -1.361618 |
| F | 1.191168  | 0.695729  | -0.788078 |
| F | -3.496423 | 0.679542  | -1.533852 |
| F | -3.387349 | 3.269544  | -2.065176 |
| F | -3.477754 | 0.215524  | 1.055721  |
| F | -5.701555 | -1.129775 | 1.701937  |
| F | -4.16603  | -4.865274 | -0.697841 |
| F | -1.915842 | -3.537948 | -1.33138  |
| C | 4.506576  | 1.637866  | 0.6368    |
| H | 4.880663  | 2.601771  | 0.991467  |
| H | 5.310135  | 0.905036  | 0.706052  |
| H | 4.234307  | 1.753987  | -0.418443 |
| C | -0.043135 | 2.795828  | 1.785774  |
| C | 0.253687  | 4.139708  | 1.535055  |
| C | -1.381254 | 2.391567  | 1.750502  |
| C | -0.759206 | 5.046135  | 1.238501  |
| H | 1.281124  | 4.480215  | 1.584624  |
| C | -2.392795 | 3.297788  | 1.465728  |
| H | -1.62908  | 1.351164  | 1.916956  |
| C | -2.084901 | 4.629798  | 1.196896  |
| H | -0.509696 | 6.081328  | 1.038538  |
| H | -3.420563 | 2.954071  | 1.427622  |
| H | -2.871723 | 5.333509  | 0.953504  |

---

11

|   |           |           |           |
|---|-----------|-----------|-----------|
| C | -0.355755 | 0.370369  | -0.101855 |
| C | -0.892137 | 1.577438  | -0.313711 |
| C | -2.377172 | 1.811909  | -0.406982 |
| C | -3.134929 | 0.558356  | -0.051638 |
| C | -2.543283 | -0.620642 | 0.147673  |
| H | -2.642925 | 2.146241  | -1.419643 |
| H | -0.223917 | 2.413482  | -0.480422 |

|   |           |           |           |
|---|-----------|-----------|-----------|
| H | -4.21445  | 0.611059  | 0.025323  |
| C | -3.272159 | -1.884538 | 0.490478  |
| H | -2.923849 | -2.284828 | 1.448219  |
| H | -4.343314 | -1.704437 | 0.563965  |
| H | -3.09313  | -2.646658 | -0.272788 |
| C | 1.104387  | 0.12429   | -0.038673 |
| C | 1.647384  | -1.040279 | -0.58973  |
| C | 1.961199  | 1.043     | 0.572918  |
| C | 3.016824  | -1.272127 | -0.542565 |
| H | 0.990374  | -1.750534 | -1.078826 |
| C | 3.329474  | 0.811236  | 0.616095  |
| H | 1.54284   | 1.930973  | 1.0321    |
| C | 3.862459  | -0.347057 | 0.059053  |
| H | 3.424639  | -2.174622 | -0.982406 |
| H | 3.981413  | 1.53097   | 1.096874  |
| H | 4.929709  | -0.528861 | 0.097523  |
| H | -2.672627 | 2.635613  | 0.255426  |
| H | -0.750784 | -1.515743 | 0.576403  |
| N | -1.154534 | -0.779199 | 0.013125  |

---

12

|   |           |           |           |
|---|-----------|-----------|-----------|
| C | -2.683196 | 4.035438  | -0.14662  |
| C | -2.600873 | 2.699868  | -0.519853 |
| C | -1.733905 | 4.931611  | -0.616026 |
| C | -0.704727 | 4.49943   | -1.445705 |
| C | -0.630812 | 3.163854  | -1.80156  |
| N | -1.588157 | 2.334388  | -1.334706 |
| F | 2.981242  | 2.261799  | -0.823639 |
| C | 2.063265  | 2.724969  | 0.040506  |
| C | 1.07233   | 1.891363  | 0.546597  |
| C | 0.154418  | 2.552741  | 1.35996   |
| C | 0.211645  | 3.89864   | 1.675366  |
| C | 1.229828  | 4.67614   | 1.152614  |
| C | 2.161546  | 4.082451  | 0.323208  |
| B | 0.879523  | 0.30251   | 0.144508  |
| F | -0.909565 | 1.892197  | 1.851868  |
| F | -0.744756 | 4.473405  | 2.409309  |
| F | 3.112675  | 4.826966  | -0.241928 |
| C | 0.354349  | -0.593503 | 1.413859  |
| C | -0.516786 | -1.655487 | 1.227009  |
| C | -0.997081 | -2.457556 | 2.248526  |
| C | -0.573748 | -2.229678 | 3.544949  |
| C | 0.322984  | -1.201496 | 3.785654  |
| C | 0.762034  | -0.417394 | 2.729521  |

|   |           |           |           |                     |           |           |           |
|---|-----------|-----------|-----------|---------------------|-----------|-----------|-----------|
| F | -0.988702 | -1.939115 | -0.010424 | C                   | -1.745842 | -0.885586 | -3.053521 |
| F | 1.625424  | 0.563348  | 3.036558  | H                   | -1.587262 | 0.943545  | -4.04201  |
| F | 0.745586  | -0.97679  | 5.02772   | C                   | -0.307715 | -1.28678  | -3.189001 |
| F | -1.887385 | -3.426377 | 1.992668  | H                   | -0.229392 | -2.189403 | -3.801254 |
| H | 0.058698  | 5.181037  | -1.796981 | H                   | 0.271271  | -0.495948 | -3.664994 |
| H | -1.772933 | 5.969103  | -0.304411 | H                   | 0.122627  | -1.493698 | -2.206492 |
| H | -1.552144 | 1.350054  | -1.640379 | H                   | -2.144665 | -2.665833 | -2.092468 |
| H | -0.010417 | 0.276865  | -0.696235 | N                   | -2.559761 | -1.826752 | -2.460937 |
| H | -3.457829 | 4.339296  | 0.543338  | C                   | -3.721479 | 0.623566  | -3.431599 |
| C | -3.514981 | 1.650538  | -0.042806 | H                   | -4.136036 | 0.739707  | -4.442727 |
| C | -4.890177 | 1.883714  | 0.016138  | H                   | -3.872923 | 1.603726  | -2.951069 |
| C | -2.989911 | 0.429434  | 0.385143  | C                   | -4.476629 | -0.437893 | -2.671654 |
| C | -5.734975 | 0.889538  | 0.493485  | C                   | -3.916702 | -1.581673 | -2.251845 |
| H | -5.296266 | 2.826046  | -0.336013 | H                   | -5.51862  | -0.259017 | -2.439112 |
| C | -3.835599 | -0.536899 | 0.906924  | C                   | -4.657256 | -2.623563 | -1.501206 |
| H | -1.920573 | 0.263007  | 0.358907  | C                   | -4.016991 | -3.389584 | -0.522184 |
| C | -5.208074 | -0.317497 | 0.944917  | C                   | -6.020359 | -2.832923 | -1.727793 |
| H | -6.804506 | 1.058838  | 0.516721  | C                   | -4.726267 | -4.317369 | 0.231477  |
| H | -3.426731 | -1.47426  | 1.26386   | H                   | -2.967691 | -3.233401 | -0.298703 |
| H | -5.865976 | -1.094573 | 1.317234  | C                   | -6.72889  | -3.759635 | -0.974488 |
| C | 0.428351  | 2.589258  | -2.685929 | H                   | -6.520484 | -2.278255 | -2.512751 |
| H | 0.712651  | 1.592028  | -2.341415 | C                   | -6.086178 | -4.503046 | 0.011291  |
| H | 0.062955  | 2.519678  | -3.713781 | H                   | -4.210495 | -4.882941 | 0.998455  |
| H | 1.309627  | 3.229837  | -2.67465  | H                   | -7.784227 | -3.912511 | -1.167203 |
| F | -1.02244  | -2.983876 | 4.544005  | H                   | -6.640107 | -5.227407 | 0.596045  |
| F | 1.264466  | 5.987142  | 1.387269  |                     |           |           |           |
| C | 5.742293  | -3.321535 | -0.480737 |                     |           |           |           |
| C | 4.703681  | -2.598334 | 0.082815  | TS <sub>12/13</sub> |           |           |           |
| C | 4.561803  | -1.230777 | -0.106816 | C                   | -2.80266  | 3.990914  | -0.045155 |
| C | 5.509051  | -0.611007 | -0.910041 | C                   | -2.674606 | 2.693918  | -0.535764 |
| C | 6.558463  | -1.306443 | -1.488678 | C                   | -1.889727 | 4.953119  | -0.448971 |
| C | 6.675343  | -2.669562 | -1.270471 | C                   | -0.857076 | 4.599342  | -1.307663 |
| F | 5.419121  | 0.700212  | -1.14452  | C                   | -0.768289 | 3.28809   | -1.761008 |
| F | 7.450669  | -0.679457 | -2.251374 | N                   | -1.683535 | 2.381147  | -1.384533 |
| F | 7.67729   | -3.34995  | -1.817953 | F                   | 2.897292  | 2.288996  | -0.849417 |
| F | 5.851589  | -4.631147 | -0.273    | C                   | 1.991821  | 2.729688  | 0.042437  |
| F | 3.814163  | -3.256754 | 0.831969  | C                   | 1.042116  | 1.870079  | 0.580792  |
| C | 3.40321   | -0.469476 | 0.478059  | C                   | 0.132804  | 2.504809  | 1.424376  |
| H | 3.120124  | -0.941107 | 1.421772  | C                   | 0.157401  | 3.853693  | 1.729463  |
| H | 3.732748  | 0.546005  | 0.705436  | C                   | 1.129621  | 4.660081  | 1.165662  |
| C | 2.194795  | -0.439142 | -0.474029 | C                   | 2.053319  | 4.091491  | 0.311273  |
| H | 1.921562  | -1.479919 | -0.694728 | B                   | 0.866335  | 0.28778   | 0.158127  |
| H | 2.51097   | 0.001986  | -1.425795 | F                   | -0.882981 | 1.810523  | 1.968168  |
| C | -2.251989 | 0.279132  | -3.501852 | F                   | -0.789929 | 4.403475  | 2.493328  |
|   |           |           |           | F                   | 2.950913  | 4.865216  | -0.303844 |

|   |           |           |           |    |           |           |           |
|---|-----------|-----------|-----------|----|-----------|-----------|-----------|
| C | 0.364453  | -0.634272 | 1.422439  | H  | 3.141878  | -0.905686 | 1.415573  |
| C | -0.493603 | -1.70408  | 1.233642  | H  | 3.717666  | 0.590336  | 0.687131  |
| C | -0.970474 | -2.516838 | 2.247901  | C  | 2.190689  | -0.429211 | -0.473737 |
| C | -0.552908 | -2.291844 | 3.54608   | H  | 1.941948  | -1.477155 | -0.692391 |
| C | 0.33534   | -1.257131 | 3.791743  | H  | 2.489969  | 0.02282   | -1.426163 |
| C | 0.769267  | -0.463697 | 2.740437  | C  | -2.089892 | 0.44237   | -3.196777 |
| F | -0.95678  | -1.996832 | -0.010239 | C  | -1.611277 | -0.829723 | -2.840121 |
| F | 1.621096  | 0.522869  | 3.055792  | H  | -1.446961 | 0.944615  | -3.917315 |
| F | 0.753759  | -1.035243 | 5.035676  | C  | -0.173904 | -1.211219 | -2.981554 |
| F | -1.852001 | -3.493141 | 1.981386  | H  | -0.05439  | -1.770994 | -3.914274 |
| H | -0.105246 | 5.319447  | -1.606744 | H  | 0.458614  | -0.326691 | -3.018437 |
| H | -1.954253 | 5.963545  | -0.062196 | H  | 0.148888  | -1.829697 | -2.143736 |
| H | -1.771999 | 1.233506  | -2.130282 | H  | -2.040216 | -2.612991 | -2.009934 |
| H | -0.032451 | 0.280571  | -0.670854 | N  | -2.434095 | -1.751591 | -2.362795 |
| H | -3.580326 | 4.211475  | 0.673845  | C  | -3.589939 | 0.63765   | -3.402483 |
| C | -3.568144 | 1.600803  | -0.088761 | H  | -3.845902 | 0.653281  | -4.469296 |
| C | -4.953847 | 1.761352  | -0.083172 | H  | -3.894819 | 1.614727  | -3.008057 |
| C | -3.001761 | 0.417926  | 0.390539  | C  | -4.384248 | -0.4411   | -2.714234 |
| C | -5.769027 | 0.73692   | 0.387814  | C  | -3.838974 | -1.566272 | -2.250014 |
| H | -5.391    | 2.680018  | -0.461103 | H  | -5.449272 | -0.29449  | -2.586574 |
| C | -3.818032 | -0.578925 | 0.904707  | C  | -4.569727 | -2.658227 | -1.57181  |
| H | -1.923797 | 0.314981  | 0.402771  | C  | -3.952069 | -3.418919 | -0.574499 |
| C | -5.201549 | -0.430616 | 0.888174  | C  | -5.907774 | -2.915021 | -1.882491 |
| H | -6.845913 | 0.856255  | 0.374558  | C  | -4.663358 | -4.392808 | 0.115825  |
| H | -3.377144 | -1.483435 | 1.307353  | H  | -2.926886 | -3.225144 | -0.279777 |
| H | -5.833747 | -1.229222 | 1.259872  | C  | -6.617528 | -3.886693 | -1.190208 |
| C | 0.338034  | 2.826416  | -2.665728 | H  | -6.388601 | -2.361202 | -2.680172 |
| H | 0.684724  | 1.839398  | -2.350969 | C  | -5.999649 | -4.626617 | -0.186076 |
| H | -0.000349 | 2.77496   | -3.70423  | H  | -4.168235 | -4.953453 | 0.899601  |
| H | 1.18157   | 3.515292  | -2.616372 | H  | -7.653982 | -4.075542 | -1.443136 |
| F | -0.997131 | -3.054878 | 4.540935  | H  | -6.555122 | -5.385184 | 0.351812  |
| F | 1.116235  | 5.976781  | 1.375827  |    |           |           |           |
| C | 5.780606  | -3.247734 | -0.517204 |    |           |           |           |
| C | 4.735983  | -2.540739 | 0.055587  | 13 |           |           |           |
| C | 4.575008  | -1.174112 | -0.125768 | C  | -3.046582 | 4.140334  | 0.141297  |
| C | 5.509318  | -0.537753 | -0.931327 | C  | -2.808672 | 2.877056  | -0.398534 |
| C | 6.564808  | -1.216937 | -1.518782 | C  | -2.212091 | 5.185508  | -0.231072 |
| C | 6.701031  | -2.579447 | -1.308108 | C  | -1.17506  | 4.939894  | -1.119603 |
| F | 5.400398  | 0.772428  | -1.160003 | C  | -0.996615 | 3.644476  | -1.607693 |
| F | 7.444902  | -0.575336 | -2.283492 | N  | -1.80545  | 2.643893  | -1.251964 |
| F | 7.708983  | -3.243905 | -1.864854 | F  | 2.75689   | 2.333071  | -0.945935 |
| F | 5.906613  | -4.557594 | -0.318095 | C  | 1.87044   | 2.736773  | -0.016867 |
| F | 3.857586  | -3.215056 | 0.804501  | C  | 0.99438   | 1.832425  | 0.568787  |
| C | 3.407839  | -0.432868 | 0.467387  | C  | 0.09466   | 2.422002  | 1.454508  |
|   |           |           |           | C  | 0.052175  | 3.775101  | 1.740124  |

|   |           |           |           |    |           |           |           |
|---|-----------|-----------|-----------|----|-----------|-----------|-----------|
| C | 0.944412  | 4.628437  | 1.117298  | F  | 5.485941  | 0.959826  | -1.027781 |
| C | 1.863078  | 4.102886  | 0.231335  | F  | 7.608356  | -0.307132 | -2.091765 |
| B | 0.888386  | 0.254832  | 0.116032  | F  | 7.933847  | -2.974069 | -1.714522 |
| F | -0.843304 | 1.678567  | 2.068224  | F  | 6.10939   | -4.369961 | -0.265385 |
| F | -0.875882 | 4.277802  | 2.557127  | F  | 3.980901  | -3.108012 | 0.799597  |
| F | 2.679357  | 4.9206    | -0.440242 | C  | 3.459047  | -0.339988 | 0.497961  |
| C | 0.353839  | -0.715444 | 1.327533  | H  | 3.201521  | -0.810443 | 1.449462  |
| C | -0.503705 | -1.773609 | 1.085157  | H  | 3.705676  | 0.70307   | 0.704578  |
| C | -0.97548  | -2.637044 | 2.060083  | C  | 2.263579  | -0.415572 | -0.466205 |
| C | -0.565327 | -2.470798 | 3.36884   | H  | 2.070827  | -1.479835 | -0.666806 |
| C | 0.313411  | -1.441754 | 3.667328  | H  | 2.563597  | 0.035536  | -1.418618 |
| C | 0.748407  | -0.600781 | 2.655197  | C  | -1.783431 | 0.161418  | -3.061107 |
| F | -0.967497 | -2.01132  | -0.174544 | C  | -1.437067 | -1.263776 | -2.890573 |
| F | 1.586827  | 0.379763  | 3.018665  | H  | -1.096655 | 0.620608  | -3.774804 |
| F | 0.720723  | -1.272925 | 4.923004  | C  | -0.033381 | -1.718493 | -3.01573  |
| F | -1.846324 | -3.611847 | 1.748023  | H  | 0.308522  | -1.555893 | -4.041093 |
| H | -0.489874 | 5.727971  | -1.409922 | H  | 0.575851  | -1.090831 | -2.355594 |
| H | -2.348289 | 6.173901  | 0.192028  | H  | 0.095746  | -2.76403  | -2.738597 |
| H | -1.538537 | 0.636872  | -2.091601 | H  | -2.112066 | -3.062478 | -2.368945 |
| H | 0.037144  | 0.245441  | -0.758717 | N  | -2.370672 | -2.099277 | -2.56351  |
| H | -3.836857 | 4.279889  | 0.867635  | C  | -3.249992 | 0.430799  | -3.396533 |
| C | -3.638109 | 1.703611  | -0.016243 | H  | -3.432897 | 0.377572  | -4.476276 |
| C | -5.031246 | 1.777218  | 0.002667  | H  | -3.482616 | 1.449849  | -3.07997  |
| C | -3.009603 | 0.511097  | 0.354131  | C  | -4.156641 | -0.538041 | -2.692151 |
| C | -5.788302 | 0.671681  | 0.384556  | C  | -3.743836 | -1.749122 | -2.323337 |
| H | -5.522903 | 2.6992    | -0.290235 | H  | -5.171565 | -0.243365 | -2.453026 |
| C | -3.765815 | -0.572546 | 0.777033  | C  | -4.526893 | -2.774    | -1.609258 |
| H | -1.926836 | 0.465108  | 0.350107  | C  | -3.922504 | -3.550768 | -0.617439 |
| C | -5.156559 | -0.50275  | 0.779354  | C  | -5.892124 | -2.924949 | -1.860317 |
| H | -6.870383 | 0.73434   | 0.385949  | C  | -4.676038 | -4.448672 | 0.127965  |
| H | -3.272793 | -1.485231 | 1.092101  | H  | -2.875487 | -3.414342 | -0.369644 |
| H | -5.740617 | -1.364629 | 1.084746  | C  | -6.642146 | -3.823764 | -1.113978 |
| C | 0.10693   | 3.305673  | -2.574081 | H  | -6.361018 | -2.343029 | -2.645399 |
| H | 0.491978  | 2.306028  | -2.359059 | C  | -6.037917 | -4.584794 | -0.116921 |
| H | -0.272629 | 3.321895  | -3.60067  | H  | -4.194971 | -5.020922 | 0.911866  |
| H | 0.931275  | 4.017533  | -2.506683 | H  | -7.700591 | -3.936116 | -1.315151 |
| F | -1.0078   | -3.284531 | 4.323937  | H  | -6.627733 | -5.281822 | 0.465743  |
| F | 0.857669  | 5.945591  | 1.306069  |    |           |           |           |
| C | 5.955071  | -3.059711 | -0.443591 |    |           |           |           |
| C | 4.869112  | -2.393745 | 0.100021  | 14 |           |           |           |
| C | 4.674072  | -1.02875  | -0.062141 | F  | -1.781203 | 2.601463  | -0.544696 |
| C | 5.620519  | -0.350388 | -0.817753 | C  | -0.471894 | 2.504081  | -0.813003 |
| C | 6.717936  | -0.988354 | -1.374735 | C  | 0.229663  | 1.336159  | -0.540887 |
| C | 6.886108  | -2.349961 | -1.184563 | C  | 1.580616  | 1.394558  | -0.872815 |
|   |           |           |           | C  | 2.212686  | 2.511371  | -1.390085 |

|   |           |           |           |                     |           |           |           |
|---|-----------|-----------|-----------|---------------------|-----------|-----------|-----------|
| C | 1.469003  | 3.656207  | -1.629405 | H                   | 2.885864  | -0.705264 | 2.675591  |
| C | 0.115248  | 3.648164  | -1.345473 | N                   | 2.825039  | 0.292966  | 2.485399  |
| B | -0.32057  | 0.046646  | 0.31866   | C                   | 2.927581  | 3.07749   | 2.23941   |
| F | 2.374938  | 0.333496  | -0.631816 | H                   | 3.402554  | 3.427134  | 3.164265  |
| F | 3.525604  | 2.506374  | -1.638218 | H                   | 2.717353  | 3.966491  | 1.643602  |
| F | -0.609275 | 4.741574  | -1.572412 | C                   | 3.885274  | 2.178326  | 1.509088  |
| C | 0.233215  | -1.343455 | -0.338462 | C                   | 3.855201  | 0.854166  | 1.652512  |
| C | 0.950457  | -2.272416 | 0.393156  | H                   | 4.632345  | 2.611515  | 0.856494  |
| C | 1.536477  | -3.403975 | -0.1488   | C                   | 4.782921  | -0.127641 | 1.058941  |
| C | 1.383504  | -3.661919 | -1.499211 | C                   | 4.348942  | -1.412731 | 0.725306  |
| C | 0.652646  | -2.778062 | -2.2763   | C                   | 6.113231  | 0.2248    | 0.818812  |
| C | 0.105658  | -1.648215 | -1.686666 | C                   | 5.22273   | -2.326369 | 0.151682  |
| F | 1.203784  | -2.068729 | 1.717641  | H                   | 3.316829  | -1.701192 | 0.877049  |
| F | -0.542951 | -0.801881 | -2.49934  | C                   | 6.982518  | -0.686296 | 0.236069  |
| F | 0.506421  | -3.013428 | -3.577689 | H                   | 6.471283  | 1.206341  | 1.106011  |
| F | 2.29276   | -4.211285 | 0.604137  | C                   | 6.540886  | -1.962935 | -0.09817  |
| H | 0.964835  | 2.3277    | 1.657271  | H                   | 4.862366  | -3.31487  | -0.106943 |
| H | 0.264123  | 0.156747  | 1.380031  | H                   | 8.011857  | -0.403224 | 0.052995  |
| F | 1.946866  | -4.737502 | -2.044113 | H                   | 7.22396   | -2.67271  | -0.548471 |
| F | 2.051968  | 4.746102  | -2.123355 |                     |           |           |           |
| C | -6.152486 | -1.498188 | 0.845006  |                     |           |           |           |
| C | -4.836575 | -1.451769 | 0.416798  | TS <sub>14/15</sub> |           |           |           |
| C | -4.278987 | -0.317963 | -0.159368 | F                   | 1.751426  | 2.562982  | 0.793416  |
| C | -5.107584 | 0.788582  | -0.283475 | C                   | 0.423639  | 2.550708  | 0.971735  |
| C | -6.429626 | 0.77268   | 0.134266  | C                   | -0.328821 | 1.428784  | 0.651012  |
| C | -6.953752 | -0.376947 | 0.70114   | C                   | -1.695304 | 1.563222  | 0.881654  |
| F | -4.636918 | 1.915946  | -0.819844 | C                   | -2.295036 | 2.716121  | 1.354476  |
| F | -7.197551 | 1.850704  | -0.00335  | C                   | -1.498248 | 3.810087  | 1.658833  |
| F | -8.219271 | -0.404598 | 1.107697  | C                   | -0.130565 | 3.724576  | 1.47092   |
| F | -6.652485 | -2.603647 | 1.392506  | B                   | 0.193121  | 0.089334  | -0.119911 |
| F | -4.086169 | -2.546783 | 0.573793  | F                   | -2.519765 | 0.54413   | 0.577676  |
| C | -2.82942  | -0.284052 | -0.563552 | F                   | -3.617407 | 2.794747  | 1.504383  |
| H | -2.576278 | -1.245989 | -1.015707 | F                   | 0.639034  | 4.771421  | 1.757527  |
| H | -2.69099  | 0.483304  | -1.326181 | C                   | -0.305258 | -1.258432 | 0.646426  |
| C | -1.910989 | -0.016656 | 0.641226  | C                   | -0.949284 | -2.296196 | -0.001997 |
| H | -2.07244  | -0.821989 | 1.370073  | C                   | -1.46008  | -3.414285 | 0.635077  |
| H | -2.24075  | 0.908489  | 1.127418  | C                   | -1.292302 | -3.541898 | 2.002754  |
| C | 1.610805  | 2.361289  | 2.547305  | C                   | -0.623734 | -2.547634 | 2.69924   |
| C | 1.787498  | 0.928955  | 2.92494   | C                   | -0.153801 | -1.436517 | 2.015044  |
| H | 1.041535  | 2.867489  | 3.328534  | F                   | -1.165578 | -2.236791 | -1.344307 |
| C | 0.824235  | 0.255384  | 3.832783  | F                   | 0.466456  | -0.497136 | 2.741767  |
| H | 1.066881  | 0.549189  | 4.860627  | F                   | -0.453899 | -2.666919 | 4.012764  |
| H | -0.185081 | 0.59948   | 3.606067  | F                   | -2.137631 | -4.340845 | -0.04672  |
| H | 0.864587  | -0.828636 | 3.735115  | H                   | -0.840537 | 2.250013  | -1.59633  |
|   |           |           |           | H                   | -0.47904  | 0.124232  | -1.16458  |

|   |           |           |           |
|---|-----------|-----------|-----------|
| F | -1.772912 | -4.604717 | 2.64045   |
| F | -2.046615 | 4.929668  | 2.120523  |
| C | 5.937412  | -1.533999 | -1.055927 |
| C | 4.653015  | -1.47396  | -0.542693 |
| C | 4.15521   | -0.343451 | 0.091485  |
| C | 5.01024   | 0.74579   | 0.186485  |
| C | 6.302079  | 0.715941  | -0.316537 |
| C | 6.766685  | -0.429721 | -0.940493 |
| F | 4.594498  | 1.868715  | 0.773721  |
| F | 7.096199  | 1.77737   | -0.208598 |
| F | 8.00001   | -0.467776 | -1.433715 |
| F | 6.379107  | -2.634563 | -1.659125 |
| F | 3.871145  | -2.550309 | -0.676359 |
| C | 2.734527  | -0.292812 | 0.585121  |
| H | 2.48651   | -1.262157 | 1.025184  |
| H | 2.654581  | 0.457003  | 1.37176   |
| C | 1.750495  | 0.018195  | -0.558491 |
| H | 1.861121  | -0.778388 | -1.307423 |
| H | 2.065415  | 0.950889  | -1.042585 |
| C | -1.242246 | 2.062236  | -2.596961 |
| C | -1.343359 | 0.56958   | -2.759028 |
| H | -0.502403 | 2.433434  | -3.308834 |
| C | -0.285857 | -0.182054 | -3.494962 |
| H | -0.42711  | 0.006147  | -4.565567 |
| H | 0.697417  | 0.185406  | -3.203372 |
| H | -0.343304 | -1.251955 | -3.299239 |
| H | -2.575036 | -0.999821 | -2.663883 |
| N | -2.512109 | 0.009537  | -2.56437  |
| C | -2.590319 | 2.767645  | -2.768485 |
| H | -2.837907 | 2.868885  | -3.83249  |
| H | -2.514836 | 3.778457  | -2.367451 |
| C | -3.689584 | 2.006277  | -2.080371 |
| C | -3.655516 | 0.675291  | -2.019647 |
| H | -4.527115 | 2.530654  | -1.638878 |
| C | -4.696985 | -0.213286 | -1.468061 |
| C | -4.350672 | -1.392531 | -0.803588 |
| C | -6.046232 | 0.115183  | -1.617048 |
| C | -5.336258 | -2.226372 | -0.292934 |
| H | -3.30869  | -1.644658 | -0.652513 |
| C | -7.029138 | -0.71436  | -1.095405 |
| H | -6.322687 | 1.010054  | -2.162391 |
| C | -6.677058 | -1.88794  | -0.435874 |
| H | -5.050862 | -3.135938 | 0.221813  |
| H | -8.072957 | -0.452411 | -1.217382 |

|   |           |           |           |
|---|-----------|-----------|-----------|
| H | -7.445881 | -2.538189 | -0.036872 |
|---|-----------|-----------|-----------|

---

15

|   |           |           |           |
|---|-----------|-----------|-----------|
| F | -1.955229 | 2.772825  | -1.240534 |
| C | -0.730944 | 3.093597  | -0.813524 |
| C | 0.174708  | 2.091424  | -0.474935 |
| C | 1.443906  | 2.516943  | -0.091985 |
| C | 1.789543  | 3.851918  | 0.003468  |
| C | 0.854292  | 4.817005  | -0.339054 |
| C | -0.410893 | 4.439666  | -0.762398 |
| B | -0.248754 | 0.579482  | -0.431814 |
| F | 2.375845  | 1.620466  | 0.234741  |
| F | 2.9959    | 4.21543   | 0.420587  |
| F | -1.295842 | 5.366077  | -1.106941 |
| C | 0.727597  | -0.538138 | -0.945866 |
| C | 0.609024  | -1.873651 | -0.549573 |
| C | 1.387274  | -2.89218  | -1.063211 |
| C | 2.3275    | -2.597967 | -2.038513 |
| C | 2.508708  | -1.288179 | -2.446059 |
| C | 1.718427  | -0.290604 | -1.900175 |
| F | -0.262355 | -2.221297 | 0.406977  |
| F | 1.92981   | 0.94157   | -2.359458 |
| F | 3.42969   | -1.002156 | -3.355854 |
| F | 1.265972  | -4.136311 | -0.619018 |
| H | 1.692129  | 2.142119  | 2.606598  |
| H | 0.44886   | 0.438154  | 1.801635  |
| F | 3.049964  | -3.566572 | -2.570043 |
| F | 1.170527  | 6.098891  | -0.263971 |
| C | -5.503359 | -2.134355 | 0.696337  |
| C | -4.229079 | -1.878248 | 0.219112  |
| C | -3.935405 | -0.749303 | -0.532823 |
| C | -4.974952 | 0.136016  | -0.778324 |
| C | -6.26043  | -0.09321  | -0.31413  |
| C | -6.523563 | -1.235465 | 0.424854  |
| F | -4.743784 | 1.247956  | -1.478187 |
| F | -7.236338 | 0.770434  | -0.56888  |
| F | -7.748777 | -1.468011 | 0.875669  |
| F | -5.755508 | -3.227105 | 1.40745   |
| F | -3.256475 | -2.748816 | 0.498886  |
| C | -2.537344 | -0.47532  | -1.013442 |
| H | -2.068579 | -1.419292 | -1.299033 |
| H | -2.592157 | 0.156731  | -1.901781 |
| C | -1.695889 | 0.220159  | 0.08257   |
| H | -1.625589 | -0.459603 | 0.937395  |



|   |           |           |           |
|---|-----------|-----------|-----------|
| H | -2.227727 | 1.110092  | 0.423139  |
| C | 1.567219  | 1.37091   | 3.370001  |
| C | 0.920866  | 0.118473  | 2.745741  |
| H | 0.897035  | 1.773196  | 4.134278  |
| C | -0.16388  | -0.486569 | 3.626265  |
| H | 0.25503   | -0.74689  | 4.601193  |
| H | -0.982815 | 0.22284   | 3.769486  |
| H | -0.568375 | -1.397221 | 3.175402  |
| H | 1.557102  | -1.615289 | 1.812214  |
| N | 1.91999   | -0.916852 | 2.445938  |
| C | 2.954585  | 1.067897  | 3.953981  |
| H | 2.841259  | 0.370665  | 4.795089  |
| H | 3.405407  | 1.980384  | 4.346132  |
| C | 3.803454  | 0.437756  | 2.890245  |
| C | 3.238975  | -0.533955 | 2.162693  |
| H | 4.830342  | 0.731392  | 2.72297   |
| C | 3.951049  | -1.297905 | 1.112921  |
| C | 3.867159  | -2.694127 | 1.069159  |
| C | 4.733952  | -0.637524 | 0.162768  |
| C | 4.567001  | -3.413372 | 0.107796  |
| H | 3.276176  | -3.218764 | 1.813264  |
| C | 5.433008  | -1.35889  | -0.79946  |
| H | 4.775513  | 0.445534  | 0.178365  |
| C | 5.354069  | -2.747319 | -0.828017 |
| H | 4.498199  | -4.494753 | 0.0887    |
| H | 6.030062  | -0.834353 | -1.53591  |
| H | 5.891914  | -3.307724 | -1.582963 |

---

16

|   |          |           |           |
|---|----------|-----------|-----------|
| H | 2.720445 | 0.99247   | 1.661319  |
| H | 2.859534 | -1.428746 | 1.358883  |
| C | 3.030916 | 0.611769  | 0.683579  |
| C | 2.496804 | -0.818748 | 0.527715  |
| H | 4.123231 | 0.611888  | 0.656164  |
| C | 2.947859 | -1.459724 | -0.785327 |
| H | 2.479109 | -0.956819 | -1.63414  |
| H | 4.033377 | -1.396747 | -0.898734 |
| H | 2.649381 | -2.508468 | -0.813459 |
| H | 0.646314 | -1.139826 | 1.475777  |
| N | 1.034205 | -0.836567 | 0.592583  |
| C | 2.453471 | 1.505912  | -0.413349 |
| H | 2.955812 | 1.308297  | -1.368348 |
| H | 2.655396 | 2.556093  | -0.181439 |
| C | 0.970171 | 1.292403  | -0.532492 |

|   |           |           |           |
|---|-----------|-----------|-----------|
| C | 0.343853  | 0.241102  | 0.023696  |
| H | 0.382218  | 2.009912  | -1.091623 |
| C | -1.133662 | 0.092055  | 0.009923  |
| C | -1.716326 | -1.172172 | -0.118374 |
| C | -1.967056 | 1.20713   | 0.133133  |
| C | -3.098611 | -1.313701 | -0.142861 |
| H | -1.07147  | -2.037118 | -0.2174   |
| C | -3.347844 | 1.064959  | 0.104465  |
| H | -1.522074 | 2.185725  | 0.272262  |
| C | -3.919059 | -0.196461 | -0.034183 |
| H | -3.53621  | -2.299087 | -0.253947 |
| H | -3.98092  | 1.93901   | 0.202696  |
| H | -4.996674 | -0.307759 | -0.051635 |

---

TS<sub>16/17</sub>

|   |           |           |           |
|---|-----------|-----------|-----------|
| H | -2.134521 | 0.56253   | 1.660956  |
| C | -2.385332 | 0.616459  | 0.592303  |
| C | -3.252362 | 1.84431   | 0.355881  |
| H | -3.506049 | 1.915421  | -0.704118 |
| H | -4.175636 | 1.778093  | 0.935774  |
| H | -2.733241 | 2.760852  | 0.649055  |
| H | -0.630776 | 1.588307  | 0.178     |
| N | -1.127667 | 0.77518   | -0.166557 |
| C | -2.308199 | -1.604906 | -0.712473 |
| H | -2.452007 | -1.252685 | -1.742284 |
| H | -2.696887 | -2.623418 | -0.669509 |
| C | -0.839992 | -1.557816 | -0.411374 |
| C | -0.290199 | -0.355854 | -0.192716 |
| H | -0.220472 | -2.440025 | -0.499302 |
| C | 1.167103  | -0.122994 | -0.070051 |
| C | 1.749371  | 1.015314  | -0.63646  |
| C | 1.988466  | -1.034384 | 0.598905  |
| C | 3.118399  | 1.233828  | -0.539335 |
| H | 1.129281  | 1.716149  | -1.184895 |
| C | 3.356413  | -0.81583  | 0.693053  |
| H | 1.541661  | -1.905869 | 1.062887  |
| C | 3.926872  | 0.319672  | 0.126024  |
| H | 3.554793  | 2.11656   | -0.99159  |
| H | 3.978501  | -1.528607 | 1.221422  |
| H | 4.99368   | 0.490984  | 0.2042    |
| C | -3.11939  | -0.690914 | 0.221646  |
| H | -4.077396 | -0.454318 | -0.250436 |
| H | -3.34416  | -1.23154  | 1.143318  |

17

---

|   |           |           |           |
|---|-----------|-----------|-----------|
| H | -2.600492 | -0.148897 | -1.500742 |
| C | -2.502858 | -0.548597 | -0.478171 |
| C | -3.251236 | -1.868714 | -0.379685 |
| H | -3.180353 | -2.260341 | 0.637508  |
| H | -4.304357 | -1.734654 | -0.635048 |
| H | -2.830674 | -2.611804 | -1.062619 |
| H | -0.659448 | -1.453985 | -0.768646 |
| N | -1.094159 | -0.770172 | -0.160754 |
| C | -2.302293 | 1.827023  | 0.320852  |
| H | -2.525887 | 2.485421  | 1.165277  |
| H | -2.657574 | 2.350765  | -0.575018 |
| C | -0.818142 | 1.586911  | 0.239835  |
| C | -0.297004 | 0.371765  | 0.009229  |
| H | -0.142765 | 2.406268  | 0.45234   |
| C | 1.165479  | 0.11867   | 0.003928  |
| C | 1.67565   | -1.072079 | 0.530415  |
| C | 2.056727  | 1.055767  | -0.52586  |
| C | 3.04478   | -1.31059  | 0.541442  |
| H | 0.99005   | -1.797875 | 0.952659  |
| C | 3.424449  | 0.816759  | -0.511958 |
| H | 1.666283  | 1.965469  | -0.966904 |
| C | 3.924077  | -0.366927 | 0.022233  |
| H | 3.426109  | -2.233681 | 0.962305  |
| H | 4.102869  | 1.551526  | -0.92956  |
| H | 4.991131  | -0.554055 | 0.028915  |
| C | -3.049538 | 0.501698  | 0.485454  |
| H | -2.915434 | 0.124833  | 1.504655  |
| H | -4.12089  | 0.6321    | 0.313873  |

18

---

|   |           |           |           |
|---|-----------|-----------|-----------|
| C | -3.180873 | -4.080214 | -0.305764 |
| C | -3.176221 | -2.790949 | 0.217747  |
| C | -2.103867 | -4.919731 | -0.074838 |
| C | -1.012222 | -4.469387 | 0.65787   |
| C | -1.015624 | -3.184616 | 1.168319  |
| N | -2.102808 | -2.408588 | 0.947251  |
| F | 1.199044  | -2.598988 | -0.814434 |
| C | 0.146269  | -2.027483 | -1.433458 |
| C | -0.159107 | -0.685978 | -1.245537 |
| C | -1.308306 | -0.279576 | -1.919617 |
| C | -2.108409 | -1.107931 | -2.689216 |
| C | -1.759523 | -2.440344 | -2.828267 |
| C | -0.615656 | -2.897671 | -2.203085 |

|   |           |           |           |
|---|-----------|-----------|-----------|
| B | 0.608806  | 0.343624  | -0.208374 |
| F | -1.747336 | 0.984631  | -1.786092 |
| F | -3.227117 | -0.65362  | -3.250103 |
| F | -0.287799 | -4.191543 | -2.297995 |
| C | 0.770227  | 1.857734  | -0.819994 |
| C | 0.897088  | 2.941496  | 0.037511  |
| C | 1.090279  | 4.249409  | -0.376169 |
| C | 1.192948  | 4.514983  | -1.730792 |
| C | 1.098921  | 3.469097  | -2.633109 |
| C | 0.900796  | 2.17873   | -2.164335 |
| F | 0.814513  | 2.754674  | 1.375891  |
| F | 0.843804  | 1.214259  | -3.097158 |
| F | 1.210625  | 3.713275  | -3.938171 |
| F | 1.182251  | 5.24389   | 0.505901  |
| H | -0.13726  | -5.086485 | 0.806986  |
| H | -2.093121 | -5.914236 | -0.503656 |
| H | -2.117981 | -1.464734 | 1.368729  |
| H | -0.149985 | 0.419838  | 0.756762  |
| H | -4.00422  | -4.384787 | -0.935923 |
| C | -4.256824 | -1.825296 | -0.025407 |
| C | -5.570277 | -2.27918  | -0.189536 |
| C | -3.973883 | -0.463415 | -0.150184 |
| C | -6.582065 | -1.378292 | -0.482872 |
| H | -5.802927 | -3.329837 | -0.061962 |
| C | -4.986006 | 0.430415  | -0.465546 |
| H | -2.96494  | -0.085881 | -0.031202 |
| C | -6.288368 | -0.025139 | -0.631388 |
| H | -7.598988 | -1.732256 | -0.597608 |
| H | -4.744629 | 1.478294  | -0.587725 |
| H | -7.077445 | 0.675764  | -0.875875 |
| C | 0.121038  | -2.600178 | 1.934516  |
| H | 0.240629  | -1.548528 | 1.672533  |
| H | -0.05645  | -2.681108 | 3.010439  |
| H | 1.040815  | -3.12562  | 1.682676  |
| F | 1.386365  | 5.759885  | -2.159008 |
| F | -2.539651 | -3.284657 | -3.503647 |
| C | 6.768297  | 0.066121  | 0.270027  |
| C | 5.51909   | 0.372439  | -0.248799 |
| C | 4.500553  | -0.566387 | -0.33641  |
| C | 4.790508  | -1.840641 | 0.135105  |
| C | 6.025998  | -2.176897 | 0.660247  |
| C | 7.022399  | -1.215858 | 0.726028  |
| F | 3.848926  | -2.791053 | 0.09466   |
| F | 6.264704  | -3.4099   | 1.102683  |

|                     |           |           |           |   |           |           |           |
|---------------------|-----------|-----------|-----------|---|-----------|-----------|-----------|
| F                   | 8.21281   | -1.523608 | 1.230569  | N | -2.346162 | -2.272841 | 0.955894  |
| F                   | 7.720652  | 0.992075  | 0.334751  | F | 1.216886  | -2.603131 | -0.881385 |
| F                   | 5.312265  | 1.622631  | -0.669274 | C | 0.155937  | -2.003785 | -1.456098 |
| C                   | 3.128764  | -0.220695 | -0.852679 | C | -0.098724 | -0.651903 | -1.267675 |
| H                   | 3.190017  | 0.720104  | -1.402855 | C | -1.249871 | -0.21215  | -1.915205 |
| H                   | 2.817346  | -0.992957 | -1.560436 | C | -2.102469 | -1.017671 | -2.650147 |
| C                   | 2.099833  | -0.108566 | 0.286368  | C | -1.813314 | -2.365948 | -2.775573 |
| H                   | 2.457267  | 0.650294  | 0.994449  | C | -0.664839 | -2.855302 | -2.185397 |
| H                   | 2.105714  | -1.056752 | 0.829914  | B | 0.705724  | 0.341803  | -0.227211 |
| H                   | 0.114402  | -0.077533 | 3.095007  | F | -1.6396   | 1.072696  | -1.789435 |
| C                   | -0.306004 | 0.595476  | 3.855722  | F | -3.213191 | -0.522593 | -3.195215 |
| C                   | 0.833283  | 1.351863  | 4.519725  | F | -0.378536 | -4.157335 | -2.28347  |
| H                   | 0.442078  | 2.02616   | 5.285186  | C | 0.89983   | 1.866148  | -0.802207 |
| H                   | 1.53344   | 0.655947  | 4.986135  | C | 1.012782  | 2.934021  | 0.075955  |
| H                   | 1.380215  | 1.942419  | 3.781513  | C | 1.220522  | 4.248401  | -0.308737 |
| H                   | -0.762231 | 2.27161   | 2.671994  | C | 1.349971  | 4.537336  | -1.65615  |
| N                   | -1.202885 | 1.537913  | 3.20984   | C | 1.265798  | 3.508336  | -2.579273 |
| C                   | -2.287818 | -0.964948 | 4.176846  | C | 1.05241   | 2.210544  | -2.138533 |
| H                   | -3.031364 | -1.232999 | 4.934213  | F | 0.891843  | 2.727709  | 1.413414  |
| H                   | -1.944268 | -1.923836 | 3.765832  | F | 0.997604  | 1.263944  | -3.087111 |
| C                   | -2.938553 | -0.105616 | 3.117729  | F | 1.39748   | 3.778232  | -3.87699  |
| C                   | -2.415315 | 1.090055  | 2.750384  | F | 1.296653  | 5.226827  | 0.593857  |
| H                   | -3.935074 | -0.355283 | 2.768859  | H | -0.47946  | -5.031704 | 0.648503  |
| C                   | -3.142687 | 2.054704  | 1.879965  | H | -2.507866 | -5.777961 | -0.6      |
| C                   | -2.51461  | 2.604888  | 0.760458  | H | -2.455738 | -1.207526 | 1.718045  |
| C                   | -4.437384 | 2.460425  | 2.2049    | H | -0.046468 | 0.421272  | 0.735349  |
| C                   | -3.168491 | 3.552861  | -0.018445 | H | -4.385427 | -4.163231 | -0.910822 |
| H                   | -1.52549  | 2.262597  | 0.477835  | C | -4.509908 | -1.644934 | 0.044538  |
| C                   | -5.087154 | 3.41659   | 1.431987  | C | -5.853978 | -2.028974 | 0.066699  |
| H                   | -4.918177 | 2.041216  | 3.081104  | C | -4.175618 | -0.326382 | -0.259289 |
| C                   | -4.452312 | 3.970031  | 0.323526  | C | -6.845393 | -1.100046 | -0.21637  |
| H                   | -2.67242  | 3.959933  | -0.892042 | H | -6.120145 | -3.048891 | 0.321492  |
| H                   | -6.085306 | 3.739525  | 1.70352   | C | -5.167103 | 0.594315  | -0.566644 |
| H                   | -4.956464 | 4.721731  | -0.272228 | H | -3.136255 | -0.023628 | -0.278184 |
| C                   | -1.125369 | -0.226381 | 4.853422  | C | -6.502273 | 0.209774  | -0.543035 |
| H                   | -1.524016 | 0.468845  | 5.598932  | H | -7.886318 | -1.398902 | -0.188665 |
| H                   | -0.470017 | -0.928104 | 5.37624   | H | -4.884807 | 1.606669  | -0.828224 |
| <hr/>               |           |           |           | H | -7.277619 | 0.928102  | -0.781374 |
| TS <sub>18/19</sub> |           |           |           | C | -0.076164 | -2.603554 | 1.793429  |
| C                   | -3.522504 | -3.909539 | -0.309924 | H | 0.116975  | -1.576417 | 1.484095  |
| C                   | -3.43799  | -2.639705 | 0.25801   | H | -0.199409 | -2.636532 | 2.878701  |
| C                   | -2.470368 | -4.794639 | -0.147297 | H | 0.787393  | -3.209529 | 1.524228  |
| C                   | -1.343171 | -4.387524 | 0.551585  | F | 1.555338  | 5.789028  | -2.058752 |
| C                   | -1.2966   | -3.108744 | 1.090675  | F | -2.641055 | -3.184364 | -3.424946 |

|   |           |           |           |    |           |           |           |
|---|-----------|-----------|-----------|----|-----------|-----------|-----------|
| C | 6.749429  | -0.013494 | 0.548081  | H  | -0.560864 | -1.066672 | 5.336897  |
| C | 5.5149    | 0.317931  | 0.012744  |    |           |           |           |
| C | 4.575085  | -0.641336 | -0.338121 |    |           |           |           |
| C | 4.923463  | -1.96596  | -0.111231 | 19 |           |           |           |
| C | 6.148887  | -2.329329 | 0.422459  | C  | -3.089414 | -4.239011 | -0.356488 |
| C | 7.067206  | -1.346008 | 0.752627  | C  | -3.017973 | -2.995644 | 0.278348  |
| F | 4.054361  | -2.937242 | -0.404967 | C  | -2.039713 | -5.128252 | -0.192325 |
| F | 6.45032   | -3.610393 | 0.62339   | C  | -0.953622 | -4.751485 | 0.585321  |
| F | 8.245641  | -1.679909 | 1.269609  | C  | -0.952001 | -3.489003 | 1.173879  |
| F | 7.627692  | 0.932839  | 0.869791  | N  | -1.97237  | -2.634227 | 1.02762   |
| F | 5.234513  | 1.612827  | -0.158354 | F  | 1.50094   | -2.659806 | -0.69238  |
| C | 3.216495  | -0.263282 | -0.862958 | C  | 0.434786  | -2.171618 | -1.353058 |
| H | 3.299313  | 0.693283  | -1.383777 | C  | 0.047014  | -0.84531  | -1.213716 |
| H | 2.899488  | -1.010608 | -1.593158 | C  | -1.101072 | -0.525052 | -1.929891 |
| C | 2.178831  | -0.160979 | 0.268853  | C  | -1.841781 | -1.419489 | -2.681437 |
| H | 2.550179  | 0.566392  | 1.00334   | C  | -1.40988  | -2.730879 | -2.777398 |
| H | 2.146965  | -1.126688 | 0.783346  | C  | -0.252022 | -3.101807 | -2.122217 |
| H | 0.222869  | -0.308179 | 3.089469  | B  | 0.698541  | 0.223802  | -0.150883 |
| C | -0.263    | 0.387577  | 3.779111  | F  | -1.608446 | 0.727017  | -1.858584 |
| C | 0.802048  | 1.213989  | 4.481857  | F  | -2.973513 | -1.044095 | -3.27696  |
| H | 0.340255  | 1.928995  | 5.167356  | F  | 0.169457  | -4.36614  | -2.200001 |
| H | 1.464143  | 0.562674  | 5.053949  | C  | 0.777885  | 1.764591  | -0.715001 |
| H | 1.405193  | 1.760745  | 3.754073  | C  | 0.731417  | 2.828781  | 0.171981  |
| H | -0.699266 | 2.133467  | 2.63524   | C  | 0.845644  | 4.16117   | -0.185093 |
| N | -1.109212 | 1.276052  | 2.9885    | C  | 1.039366  | 4.475451  | -1.519249 |
| C | -2.317098 | -1.113213 | 4.051266  | C  | 1.107168  | 3.453937  | -2.453223 |
| H | -3.133343 | -1.244209 | 4.76575   | C  | 0.982989  | 2.135305  | -2.037447 |
| H | -2.009388 | -2.124793 | 3.771243  | F  | 0.501798  | 2.592518  | 1.493185  |
| C | -2.841774 | -0.353607 | 2.828404  | F  | 1.074793  | 1.1993    | -2.991015 |
| C | -2.306738 | 0.919485  | 2.557239  | F  | 1.297     | 3.752555  | -3.736947 |
| H | -3.914735 | -0.413727 | 2.65232   | F  | 0.749328  | 5.130897  | 0.723875  |
| C | -3.029968 | 1.950543  | 1.769944  | H  | -0.099654 | -5.405193 | 0.708007  |
| C | -2.398968 | 2.576452  | 0.694544  | H  | -2.050654 | -6.088752 | -0.693325 |
| C | -4.311401 | 2.345299  | 2.15467   | H  | -5.010275 | 0.846466  | 2.420149  |
| C | -3.048554 | 3.595441  | 0.007724  | H  | -0.103084 | 0.218488  | 0.778652  |
| H | -1.423136 | 2.234682  | 0.369633  | H  | -3.925741 | -4.473804 | -1.00228  |
| C | -4.943916 | 3.385232  | 1.484924  | C  | -4.105584 | -1.998779 | 0.093725  |
| H | -4.797965 | 1.855019  | 2.990136  | C  | -5.440734 | -2.402958 | 0.027469  |
| C | -4.312984 | 4.012052  | 0.413447  | C  | -3.796762 | -0.645044 | -0.070046 |
| H | -2.561007 | 4.060601  | -0.840975 | C  | -6.448616 | -1.476809 | -0.213378 |
| H | -5.929597 | 3.70626   | 1.798995  | H  | -5.690955 | -3.447227 | 0.177639  |
| H | -4.810643 | 4.820313  | -0.109428 | C  | -4.801291 | 0.272649  | -0.358852 |
| C | -1.168483 | -0.372721 | 4.751744  | H  | -2.758122 | -0.334338 | -0.01399  |
| H | -1.580401 | 0.36413   | 5.448822  | C  | -6.129246 | -0.139668 | -0.42348  |
|   |           |           |           | H  | -7.481036 | -1.80321  | -0.253202 |

|   |           |           |           |    |           |           |           |
|---|-----------|-----------|-----------|----|-----------|-----------|-----------|
| H | -4.547391 | 1.307405  | -0.557086 | C  | -4.38781  | 4.559031  | 0.708368  |
| H | -6.909726 | 0.577165  | -0.649546 | H  | -4.857692 | 3.488881  | 2.50784   |
| C | 0.207821  | -3.014944 | 2.004966  | C  | -3.571115 | 4.62739   | -0.419726 |
| H | 0.451222  | -1.984426 | 1.73783   | H  | -1.959757 | 3.693756  | -1.5166   |
| H | -0.050361 | -3.047436 | 3.068707  | H  | -5.161047 | 5.301503  | 0.861739  |
| H | 1.091279  | -3.631148 | 1.841485  | H  | -3.719445 | 5.419267  | -1.143881 |
| F | 1.15312   | 5.745353  | -1.901312 | C  | -2.461436 | -0.545335 | 4.297312  |
| F | -2.116503 | -3.630413 | -3.460671 | H  | -2.423871 | 0.160966  | 5.135363  |
| C | 6.723636  | 0.498296  | 0.788826  | H  | -2.231898 | -1.536976 | 4.692743  |
| C | 5.474926  | 0.684534  | 0.216717  |    |           |           |           |
| C | 4.64295   | -0.376136 | -0.113541 |    |           |           |           |
| C | 5.114072  | -1.650093 | 0.173988  | 20 |           |           |           |
| C | 6.356919  | -1.868947 | 0.745323  | F  | -0.345995 | -2.450722 | 0.771777  |
| C | 7.166388  | -0.787129 | 1.052803  | C  | -0.735189 | -1.828261 | -0.359999 |
| F | 4.351912  | -2.712167 | -0.09688  | C  | -0.550586 | -0.456843 | -0.489751 |
| F | 6.778878  | -3.104587 | 1.003992  | C  | -0.99961  | 0.062732  | -1.697409 |
| F | 8.36024   | -0.983131 | 1.604089  | C  | -1.620126 | -0.699062 | -2.680897 |
| F | 7.496781  | 1.53917   | 1.088615  | C  | -1.808816 | -2.053061 | -2.480138 |
| F | 5.072525  | 1.938249  | -0.012423 | C  | -1.356774 | -2.62729  | -1.304097 |
| C | 3.268341  | -0.156654 | -0.685    | B  | 0.155419  | 0.367372  | 0.74851   |
| H | 3.270763  | 0.784448  | -1.23938  | F  | -0.89432  | 1.369907  | -1.967313 |
| H | 3.049996  | -0.956779 | -1.394986 | F  | -2.086003 | -0.130144 | -3.792597 |
| C | 2.191065  | -0.124603 | 0.413391  | F  | -1.582487 | -3.927743 | -1.068022 |
| H | 2.4728    | 0.651748  | 1.138119  | C  | -0.160633 | 1.977624  | 0.687183  |
| H | 2.227596  | -1.077794 | 0.948885  | C  | -1.166822 | 2.56319   | 1.434471  |
| H | -1.364342 | -0.971383 | 2.506574  | C  | -1.456372 | 3.919093  | 1.454452  |
| C | -1.398168 | -0.189045 | 3.272297  | C  | -0.685034 | 4.773566  | 0.689701  |
| C | -0.012918 | 0.053989  | 3.848234  | C  | 0.345262  | 4.249626  | -0.076681 |
| H | -0.022822 | 0.889581  | 4.55262   | C  | 0.580197  | 2.884728  | -0.062876 |
| H | 0.320066  | -0.840629 | 4.37676   | F  | -1.982685 | 1.7962    | 2.219353  |
| H | 0.705254  | 0.265929  | 3.051221  | F  | 1.570873  | 2.445486  | -0.847599 |
| H | -1.045492 | 1.482001  | 2.02463   | F  | 1.085646  | 5.067027  | -0.820803 |
| N | -1.808662 | 1.023433  | 2.531007  | F  | -2.460358 | 4.395917  | 2.192601  |
| C | -3.838705 | -0.53283  | 3.639175  | H  | -3.737761 | -3.454643 | 0.040572  |
| H | -4.61542  | -0.837253 | 4.341523  | H  | -0.370313 | -0.032689 | 1.772692  |
| H | -3.845468 | -1.242974 | 2.806579  | F  | -0.931135 | 6.08063   | 0.684     |
| C | -4.157788 | 0.862297  | 3.102568  | F  | -2.47769  | -2.782839 | -3.371992 |
| C | -3.002289 | 1.481922  | 2.375963  | C  | 6.192717  | 0.176611  | -0.425426 |
| H | -4.414554 | 1.547491  | 3.921704  | C  | 4.830975  | 0.342295  | -0.626873 |
| C | -3.201184 | 2.59953   | 1.442537  | C  | 3.90959   | -0.642764 | -0.299619 |
| C | -2.393515 | 2.664426  | 0.304792  | C  | 4.416576  | -1.810597 | 0.254353  |
| C | -4.217177 | 3.540536  | 1.634936  | C  | 5.770551  | -2.005144 | 0.469676  |
| C | -2.57911  | 3.674811  | -0.626882 | C  | 6.663683  | -1.002892 | 0.126946  |
| H | -1.669192 | 1.885593  | 0.097448  | F  | 3.578169  | -2.793953 | 0.598874  |
|   |           |           |           | F  | 6.218852  | -3.139972 | 1.001935  |

|   |           |           |           |
|---|-----------|-----------|-----------|
| F | 7.967006  | -1.172442 | 0.327264  |
| F | 7.050182  | 1.138124  | -0.757592 |
| F | 4.413309  | 1.492968  | -1.156572 |
| C | 2.428614  | -0.438999 | -0.471895 |
| H | 2.262146  | 0.293205  | -1.262505 |
| H | 1.991328  | -1.385503 | -0.800936 |
| C | 1.760995  | 0.016733  | 0.83849   |
| H | 2.306675  | 0.888106  | 1.21804   |
| H | 1.912496  | -0.779323 | 1.575183  |
| H | -1.213031 | -1.924604 | 2.891793  |
| C | -2.261785 | -1.699925 | 3.103556  |
| C | -2.348848 | -0.690566 | 4.239042  |
| H | -3.386751 | -0.402294 | 4.421946  |
| H | -1.948497 | -1.142504 | 5.147616  |
| H | -1.76521  | 0.202693  | 4.01203   |
| H | -2.39778  | -0.105688 | 1.742542  |
| N | -2.770993 | -1.04924  | 1.870853  |
| C | -3.118194 | -3.79416  | 2.076723  |
| H | -3.604633 | -4.755344 | 2.244824  |
| H | -2.112759 | -3.995249 | 1.697606  |
| C | -3.899235 | -3.012218 | 1.024677  |
| C | -3.514297 | -1.561381 | 0.945377  |
| H | -4.978978 | -3.048868 | 1.211941  |
| C | -3.971669 | -0.731407 | -0.183981 |
| C | -3.777939 | 0.657412  | -0.190987 |
| C | -4.578171 | -1.332163 | -1.295803 |
| C | -4.13094  | 1.412406  | -1.29771  |
| H | -3.355931 | 1.170829  | 0.662682  |
| C | -4.941298 | -0.571728 | -2.397423 |
| H | -4.746567 | -2.400347 | -1.330235 |
| C | -4.703838 | 0.798197  | -2.406893 |
| H | -3.947298 | 2.47914   | -1.294644 |
| H | -5.382757 | -1.055718 | -3.259013 |
| H | -4.960595 | 1.385969  | -3.279557 |
| C | -3.030293 | -2.98329  | 3.361994  |
| H | -4.034185 | -2.742363 | 3.731234  |
| H | -2.516188 | -3.537754 | 4.148726  |

---

21

|   |           |           |           |
|---|-----------|-----------|-----------|
| F | 0.45057   | -2.487443 | 0.280492  |
| C | -0.417671 | -2.110935 | -0.680762 |
| C | -0.72276  | -0.764797 | -0.853606 |
| C | -1.682268 | -0.533433 | -1.833541 |
| C | -2.308995 | -1.538922 | -2.556138 |

|   |           |           |           |
|---|-----------|-----------|-----------|
| C | -1.985584 | -2.861447 | -2.319349 |
| C | -1.022283 | -3.15087  | -1.369767 |
| B | -0.110878 | 0.338735  | 0.204239  |
| F | -2.133009 | 0.706022  | -2.091235 |
| F | -3.269574 | -1.243947 | -3.434972 |
| F | -0.729634 | -4.421306 | -1.081785 |
| C | -0.552488 | 1.882535  | -0.129044 |
| C | -1.191813 | 2.706921  | 0.779397  |
| C | -1.497517 | 4.041438  | 0.553181  |
| C | -1.14582  | 4.613066  | -0.65438  |
| C | -0.513259 | 3.833338  | -1.61161  |
| C | -0.239943 | 2.505941  | -1.332169 |
| F | -1.608916 | 2.224784  | 1.98743   |
| F | 0.324895  | 1.791445  | -2.315552 |
| F | -0.192209 | 4.37021   | -2.785988 |
| F | -2.128752 | 4.766012  | 1.480176  |
| H | -1.540236 | -2.904671 | 1.473415  |
| H | -0.611901 | 0.043547  | 1.272859  |
| F | -1.422933 | 5.890408  | -0.901305 |
| F | -2.625751 | -3.838726 | -2.959322 |
| C | 6.065508  | 0.659453  | 0.019488  |
| C | 4.750759  | 0.919253  | -0.334615 |
| C | 3.819411  | -0.091883 | -0.524006 |
| C | 4.264863  | -1.393047 | -0.331873 |
| C | 5.571392  | -1.685117 | 0.022275  |
| C | 6.477064  | -0.650866 | 0.197536  |
| F | 3.412035  | -2.410066 | -0.484235 |
| F | 5.963754  | -2.944911 | 0.197807  |
| F | 7.734223  | -0.915629 | 0.540025  |
| F | 6.932349  | 1.654574  | 0.191023  |
| F | 4.385968  | 2.195084  | -0.489774 |
| C | 2.3802    | 0.199322  | -0.852956 |
| H | 2.328948  | 1.147552  | -1.386228 |
| H | 2.013382  | -0.574253 | -1.533122 |
| C | 1.510815  | 0.235808  | 0.417202  |
| H | 1.839981  | 1.08241   | 1.03345   |
| H | 1.737526  | -0.666175 | 0.994888  |
| H | -0.665716 | 0.554467  | 3.454108  |
| C | -1.475508 | 0.031727  | 3.975992  |
| C | -2.059376 | 0.926153  | 5.056334  |
| H | -2.914788 | 0.448426  | 5.539572  |
| H | -1.29863  | 1.119536  | 5.813443  |
| H | -2.369922 | 1.88779   | 4.641149  |
| H | -3.036175 | 0.648039  | 2.694476  |

|   |           |           |           |   |           |           |           |
|---|-----------|-----------|-----------|---|-----------|-----------|-----------|
| N | -2.502226 | -0.18327  | 2.933324  | H | -0.450939 | -1.869091 | 2.17027   |
| C | -0.594511 | -2.201858 | 3.302856  | H | -0.900185 | 0.231098  | 1.197106  |
| H | -0.201505 | -3.160052 | 3.643709  | F | -1.336778 | 5.279905  | -2.57127  |
| H | 0.180871  | -1.720885 | 2.701413  | F | -3.077293 | -4.416634 | -2.166182 |
| C | -1.816574 | -2.445017 | 2.421246  | C | 5.737629  | 0.667026  | -0.074545 |
| C | -2.601235 | -1.198824 | 2.139159  | C | 4.40255   | 0.809843  | -0.414102 |
| H | -2.516646 | -3.134074 | 2.914163  | C | 3.567819  | -0.27945  | -0.621867 |
| C | -3.52082  | -1.131133 | 0.996203  | C | 4.130686  | -1.538236 | -0.461349 |
| C | -3.837934 | 0.101938  | 0.411579  | C | 5.463273  | -1.713737 | -0.122656 |
| C | -4.051693 | -2.309217 | 0.459776  | C | 6.269935  | -0.604394 | 0.069955  |
| C | -4.705714 | 0.154291  | -0.66729  | F | 3.378039  | -2.626629 | -0.631831 |
| H | -3.342322 | 1.011338  | 0.737395  | F | 5.971794  | -2.93421  | 0.019963  |
| C | -4.92644  | -2.248685 | -0.615553 | F | 7.54851   | -0.757815 | 0.396585  |
| H | -3.791564 | -3.271549 | 0.883914  | F | 6.509359  | 1.733575  | 0.113268  |
| C | -5.258209 | -1.018634 | -1.174446 | F | 3.913621  | 2.047264  | -0.539704 |
| H | -4.914424 | 1.104918  | -1.140254 | C | 2.111421  | -0.096969 | -0.953197 |
| H | -5.331518 | -3.16304  | -1.031025 | H | 2.011675  | 0.771033  | -1.607202 |
| H | -5.918831 | -0.976882 | -2.031358 | H | 1.763856  | -0.968719 | -1.511988 |
| C | -0.971373 | -1.310162 | 4.481305  | C | 1.262696  | 0.088989  | 0.31923   |
| H | -1.746212 | -1.784747 | 5.094681  | H | 1.598769  | 1.004939  | 0.822714  |
| H | -0.108855 | -1.129094 | 5.125265  | H | 1.49182   | -0.744208 | 0.987287  |

---

TS<sub>21/22</sub>

|   |           |           |           |   |           |           |           |
|---|-----------|-----------|-----------|---|-----------|-----------|-----------|
| F | 0.503552  | -2.646895 | 0.233944  | H | -0.136258 | 1.98501   | 3.212528  |
| C | -0.602129 | -2.391154 | -0.490513 | C | -0.797133 | 1.528252  | 3.96007   |
| C | -1.038377 | -1.083606 | -0.68641  | C | -1.371842 | 2.607967  | 4.859998  |
| C | -2.203894 | -0.988138 | -1.446493 | H | -2.06326  | 2.176117  | 5.587451  |
| C | -2.888587 | -2.079553 | -1.953436 | H | -0.56625  | 3.10717   | 5.399687  |
| C | -2.415077 | -3.356921 | -1.713646 | H | -1.899388 | 3.364055  | 4.27308   |
| C | -1.256262 | -3.513792 | -0.976732 | H | -2.667958 | 1.503312  | 2.97686   |
| B | -0.330387 | 0.199577  | 0.026491  | N | -1.899349 | 0.89222   | 3.223861  |
| F | -2.758199 | 0.203253  | -1.715691 | C | 0.431439  | -0.616878 | 3.717994  |
| F | -4.022352 | -1.912512 | -2.632602 | H | 0.992996  | -1.405569 | 4.221387  |
| F | -0.788781 | -4.734974 | -0.725569 | H | 1.099377  | -0.161205 | 2.983794  |
| C | -0.678885 | 1.62519   | -0.680557 | C | -0.765613 | -1.238448 | 3.001864  |
| C | -1.104832 | 2.75478   | -0.006633 | C | -1.768115 | -0.219211 | 2.509892  |
| C | -1.334776 | 3.982853  | -0.6082   | H | -1.321131 | -1.871287 | 3.706526  |
| C | -1.125072 | 4.115153  | -1.967978 | C | -2.971783 | -0.672078 | 1.758853  |
| C | -0.701879 | 3.014262  | -2.696455 | C | -3.7697   | 0.260548  | 1.091744  |
| C | -0.49415  | 1.81014   | -2.046642 | C | -3.296402 | -2.027571 | 1.689477  |
| F | -1.356362 | 2.702329  | 1.324855  | C | -4.891372 | -0.153935 | 0.388782  |
| F | -0.124167 | 0.772334  | -2.811048 | H | -3.475018 | 1.305313  | 1.058441  |
| F | -0.511524 | 3.126629  | -4.007591 | C | -4.421195 | -2.438814 | 0.984486  |
| F | -1.759872 | 5.022915  | 0.10909   | H | -2.677788 | -2.769096 | 2.178845  |
|   |           |           |           | C | -5.221414 | -1.504506 | 0.336595  |
|   |           |           |           | H | -5.484773 | 0.572855  | -0.151018 |

|   |           |           |           |
|---|-----------|-----------|-----------|
| H | -4.662227 | -3.493733 | 0.928917  |
| H | -6.085191 | -1.828856 | -0.230601 |
| C | -0.024273 | 0.451138  | 4.706814  |
| H | -0.667892 | 0.018064  | 5.480725  |
| H | 0.833084  | 0.910062  | 5.203707  |

---

22

---

|   |           |           |           |
|---|-----------|-----------|-----------|
| F | 0.405534  | -0.963527 | -2.259482 |
| C | -0.691832 | -1.60022  | -1.844554 |
| C | -1.609201 | -0.951532 | -1.015992 |
| C | -2.754307 | -1.687647 | -0.706405 |
| C | -2.949105 | -2.990051 | -1.129927 |
| C | -1.993569 | -3.597928 | -1.925391 |
| C | -0.856567 | -2.896614 | -2.295324 |
| B | -1.301422 | 0.436392  | -0.35482  |
| F | -3.706985 | -1.174143 | 0.070565  |
| F | -4.01845  | -3.674166 | -0.7397   |
| F | 0.056433  | -3.471491 | -3.068203 |
| C | -2.489267 | 1.362039  | 0.114839  |
| C | -2.486218 | 2.039583  | 1.330491  |
| C | -3.51858  | 2.872855  | 1.727817  |
| C | -4.593438 | 3.07172   | 0.876193  |
| C | -4.635    | 2.424356  | -0.349182 |
| C | -3.596408 | 1.581337  | -0.700557 |
| F | -1.486123 | 1.866936  | 2.203618  |
| F | -3.682234 | 0.968544  | -1.883116 |
| F | -5.665553 | 2.615084  | -1.162546 |
| F | -3.489681 | 3.476292  | 2.909385  |
| H | 1.877954  | -1.605181 | -0.657634 |
| H | 2.188293  | -0.833527 | 1.685745  |
| F | -5.581411 | 3.875124  | 1.234329  |
| F | -2.160456 | -4.848507 | -2.321829 |
| C | 3.690783  | 3.887714  | -0.366113 |
| C | 2.371179  | 3.531512  | -0.59879  |
| C | 2.02628   | 2.322428  | -1.184014 |
| C | 3.067543  | 1.467048  | -1.521193 |
| C | 4.393904  | 1.790591  | -1.293449 |
| C | 4.705592  | 3.011033  | -0.714045 |
| F | 2.792615  | 0.283194  | -2.072517 |
| F | 5.363126  | 0.941745  | -1.616934 |
| F | 5.971405  | 3.337451  | -0.492106 |
| F | 3.987861  | 5.055101  | 0.192471  |
| F | 1.413422  | 4.386629  | -0.232847 |
| C | 0.592067  | 1.903388  | -1.371589 |

|   |           |           |           |
|---|-----------|-----------|-----------|
| H | -0.041188 | 2.79161   | -1.397694 |
| H | 0.497575  | 1.38835   | -2.328664 |
| C | 0.173154  | 0.97083   | -0.206758 |
| H | 0.267003  | 1.544855  | 0.71842   |
| H | 0.886932  | 0.147208  | -0.158145 |
| H | 4.364638  | -1.428203 | 2.620257  |
| C | 4.167436  | -2.490602 | 2.384488  |
| C | 4.854529  | -3.362485 | 3.42415   |
| H | 4.66105   | -4.415566 | 3.208129  |
| H | 5.933138  | -3.192918 | 3.419256  |
| H | 4.482339  | -3.145297 | 4.428948  |
| H | 2.372337  | -2.645264 | 3.34854   |
| N | 2.727721  | -2.764087 | 2.404163  |
| C | 3.929651  | -1.950707 | -0.066807 |
| H | 4.272802  | -2.187853 | -1.076313 |
| H | 4.12228   | -0.880882 | 0.085219  |
| C | 2.428736  | -2.209475 | 0.063203  |
| C | 1.971173  | -1.901977 | 1.492743  |
| H | 2.215855  | -3.261371 | -0.1546   |
| C | 0.491038  | -2.115117 | 1.722581  |
| C | -0.30201  | -1.095691 | 2.252539  |
| C | -0.097861 | -3.354133 | 1.464034  |
| C | -1.655891 | -1.300963 | 2.510847  |
| H | 0.147653  | -0.134958 | 2.48126   |
| C | -1.448299 | -3.56409  | 1.725744  |
| H | 0.517751  | -4.163897 | 1.088945  |
| C | -2.230971 | -2.540182 | 2.251964  |
| H | -2.251955 | -0.496987 | 2.926927  |
| H | -1.892924 | -4.532871 | 1.524387  |
| H | -3.283524 | -2.705442 | 2.448978  |
| C | 4.699738  | -2.758942 | 0.977232  |
| H | 4.586858  | -3.82917  | 0.769925  |
| H | 5.766976  | -2.52283  | 0.940651  |

---

23

---

|   |           |           |           |
|---|-----------|-----------|-----------|
| H | -0.144965 | 2.38873   | 0.507779  |
| H | -0.40016  | 0.873287  | -1.403164 |
| H | -2.660791 | -0.108958 | -1.514511 |
| C | -2.515507 | -0.536667 | -0.504875 |
| C | -3.260668 | -1.859816 | -0.418695 |
| H | -3.129585 | -2.294056 | 0.575109  |
| H | -4.327302 | -1.716592 | -0.603675 |
| H | -2.882179 | -2.573191 | -1.155846 |
| H | -0.744907 | -1.490695 | -0.861673 |



|   |           |           |           |
|---|-----------|-----------|-----------|
| N | -1.09479  | -0.767081 | -0.239759 |
| C | -2.232235 | 1.774517  | 0.450757  |
| H | -2.574399 | 2.476215  | 1.215402  |
| H | -2.393448 | 2.257351  | -0.520769 |
| C | -0.742414 | 1.480462  | 0.623789  |
| C | -0.275469 | 0.433948  | -0.396408 |
| H | -0.550742 | 1.081359  | 1.625618  |
| C | 1.188564  | 0.108086  | -0.20527  |
| C | 2.161514  | 0.778339  | -0.94496  |
| C | 1.590525  | -0.831296 | 0.745093  |
| C | 3.51248   | 0.52069   | -0.740051 |
| H | 1.855759  | 1.505213  | -1.691267 |
| C | 2.940651  | -1.09283  | 0.948531  |
| H | 0.830032  | -1.356186 | 1.31152   |
| C | 3.905395  | -0.417338 | 0.207966  |
| H | 4.257805  | 1.047252  | -1.324559 |
| H | 3.241697  | -1.826437 | 1.687486  |
| H | 4.957281  | -0.623268 | 0.366776  |
| C | -3.041381 | 0.478734  | 0.508035  |
| H | -2.95925  | 0.035014  | 1.506759  |
| H | -4.100036 | 0.67355   | 0.313852  |

---

TS<sub>B-C</sub>

|   |           |           |           |
|---|-----------|-----------|-----------|
| H | 0.377782  | 0.521956  | 1.521347  |
| H | 1.089389  | 0.057909  | 1.636224  |
| C | -5.704742 | -1.792348 | 0.668177  |
| C | -4.415978 | -1.505356 | 0.252593  |
| C | -4.037687 | -0.238415 | -0.170649 |
| C | -5.011781 | 0.748842  | -0.15172  |
| C | -6.311391 | 0.491619  | 0.256873  |
| C | -6.657224 | -0.785144 | 0.668185  |
| F | -4.706527 | 1.988995  | -0.536233 |
| F | -7.225129 | 1.456749  | 0.258863  |
| F | -7.897681 | -1.043634 | 1.064401  |
| F | -6.035146 | -3.016764 | 1.066194  |
| F | -3.510296 | -2.487843 | 0.265682  |
| C | -2.617564 | 0.04473   | -0.576382 |
| H | -2.24565  | -0.807991 | -1.149904 |
| H | -2.604798 | 0.918244  | -1.22899  |
| C | -1.715771 | 0.274075  | 0.655253  |
| H | -1.784608 | -0.612902 | 1.290983  |
| H | -2.107529 | 1.116383  | 1.229826  |
| B | -0.188377 | 0.493579  | 0.209701  |
| C | 0.288248  | 1.958524  | -0.268511 |

|   |           |           |           |
|---|-----------|-----------|-----------|
| C | -0.560491 | 3.043547  | -0.457178 |
| C | 1.633125  | 2.226837  | -0.505126 |
| C | -0.115534 | 4.297619  | -0.857785 |
| C | 2.118861  | 3.455639  | -0.906534 |
| C | 1.232679  | 4.507173  | -1.079956 |
| C | 0.423167  | -0.776775 | -0.571513 |
| C | 0.903663  | -0.735189 | -1.87568  |
| C | 0.414698  | -2.03886  | 0.013062  |
| C | 1.367413  | -1.854887 | -2.546914 |
| C | 0.86061   | -3.18377  | -0.624774 |
| C | 1.342376  | -3.086467 | -1.917741 |
| F | 1.675805  | 5.698668  | -1.456048 |
| F | 1.813032  | -4.160712 | -2.539132 |
| F | 0.84717   | -4.360894 | -0.006805 |
| F | -0.014475 | -2.19272  | 1.276761  |
| F | 0.943277  | 0.419807  | -2.552338 |
| F | 1.864516  | -1.756713 | -3.777764 |
| F | 2.541257  | 1.250726  | -0.335525 |
| F | 3.421983  | 3.64201   | -1.117061 |
| F | -0.974697 | 5.296974  | -1.024571 |
| F | -1.879651 | 2.933381  | -0.27135  |
| H | 4.721584  | 1.380113  | 3.622272  |
| C | 4.141673  | 1.583016  | 2.71203   |
| C | 4.75173   | 2.771083  | 1.983848  |
| H | 4.202839  | 2.9729    | 1.062126  |
| H | 4.72135   | 3.65991   | 2.61629   |
| H | 5.796635  | 2.579599  | 1.725784  |
| H | 5.0193    | 0.297621  | 1.258966  |
| N | 4.208977  | 0.404741  | 1.849007  |
| C | 2.051935  | 0.564849  | 3.693195  |
| H | 0.991201  | 0.743957  | 3.893864  |
| H | 2.512741  | 0.316432  | 4.655447  |
| C | 2.210383  | -0.566564 | 2.705047  |
| C | 3.320591  | -0.61049  | 1.896562  |
| H | 1.625938  | -1.470984 | 2.811623  |
| C | 3.606772  | -1.760182 | 0.999069  |
| C | 4.050971  | -1.545573 | -0.309302 |
| C | 3.46361   | -3.067708 | 1.466957  |
| C | 4.359526  | -2.624713 | -1.128816 |
| H | 4.116468  | -0.534457 | -0.696137 |
| C | 3.776556  | -4.143407 | 0.644684  |
| H | 3.125237  | -3.238527 | 2.481975  |
| C | 4.23063   | -3.925593 | -0.651465 |
| H | 4.682162  | -2.44953  | -2.14886  |

|   |          |           |           |
|---|----------|-----------|-----------|
| H | 3.661765 | -5.153636 | 1.01747   |
| H | 4.466602 | -4.765273 | -1.293323 |
| C | 2.690161 | 1.831913  | 3.116928  |
| H | 2.129691 | 2.156554  | 2.231898  |
| H | 2.662712 | 2.650206  | 3.839409  |

---

24

|   |           |           |           |
|---|-----------|-----------|-----------|
| H | 0.225881  | 0.524652  | 1.858491  |
| H | 1.841192  | -0.604992 | 1.841069  |
| C | -5.900617 | -1.766541 | 0.481715  |
| C | -4.572107 | -1.494942 | 0.20015   |
| C | -4.126584 | -0.222168 | -0.130617 |
| C | -5.080149 | 0.785642  | -0.154938 |
| C | -6.417208 | 0.545345  | 0.121846  |
| C | -6.828204 | -0.738005 | 0.441653  |
| F | -4.717272 | 2.034412  | -0.452478 |
| F | -7.307352 | 1.534232  | 0.084408  |
| F | -8.107718 | -0.982609 | 0.709322  |
| F | -6.294138 | -3.000934 | 0.788027  |
| F | -3.698381 | -2.505909 | 0.252607  |
| C | -2.667796 | 0.052359  | -0.374682 |
| H | -2.240245 | -0.809415 | -0.893731 |
| H | -2.578403 | 0.915709  | -1.035758 |
| C | -1.904867 | 0.296804  | 0.940031  |
| H | -2.051442 | -0.580609 | 1.580834  |
| H | -2.365062 | 1.140248  | 1.462909  |
| B | -0.301809 | 0.520978  | 0.752641  |
| C | 0.151142  | 1.940054  | 0.050871  |
| C | -0.675254 | 3.006936  | -0.280342 |
| C | 1.488656  | 2.178937  | -0.22419  |
| C | -0.220568 | 4.186197  | -0.863177 |
| C | 1.992944  | 3.319165  | -0.8161   |
| C | 1.124473  | 4.348139  | -1.137458 |
| C | 0.283694  | -0.78746  | -0.068032 |
| C | 0.705827  | -0.824448 | -1.390917 |
| C | 0.314502  | -2.02318  | 0.573034  |
| C | 1.139436  | -1.97873  | -2.030156 |
| C | 0.741284  | -3.1991   | -0.020865 |
| C | 1.145957  | -3.177733 | -1.34394  |
| F | 1.578309  | 5.46648   | -1.697697 |
| F | 1.585775  | -4.291802 | -1.931634 |
| F | 0.826671  | -4.335743 | 0.675741  |
| F | -0.021542 | -2.110937 | 1.873756  |
| F | 0.735727  | 0.292416  | -2.136488 |

|   |           |           |           |
|---|-----------|-----------|-----------|
| F | 1.585658  | -1.940239 | -3.2885   |
| F | 2.415275  | 1.224729  | 0.075086  |
| F | 3.306158  | 3.438491  | -1.069885 |
| F | -1.072059 | 5.164412  | -1.1622   |
| F | -1.995632 | 2.956606  | -0.06355  |
| H | 5.268727  | 1.298456  | 3.319515  |
| C | 4.47698   | 1.485117  | 2.585779  |
| C | 4.719057  | 2.818024  | 1.894061  |
| H | 3.968682  | 2.987991  | 1.122148  |
| H | 4.651867  | 3.620056  | 2.630179  |
| H | 5.711389  | 2.863205  | 1.438144  |
| H | 5.32103   | 0.539847  | 0.868818  |
| N | 4.602384  | 0.403988  | 1.575301  |
| C | 2.811321  | -0.040827 | 3.667756  |
| H | 1.849039  | -0.099076 | 4.176822  |
| H | 3.57622   | -0.419435 | 4.353267  |
| C | 2.742156  | -0.888191 | 2.405167  |
| C | 3.842536  | -0.63625  | 1.444456  |
| H | 2.645734  | -1.959789 | 2.592213  |
| C | 4.045847  | -1.506017 | 0.276004  |
| C | 4.265968  | -0.933897 | -0.983637 |
| C | 4.010355  | -2.896819 | 0.418146  |
| C | 4.459292  | -1.752826 | -2.086569 |
| H | 4.204429  | 0.14193   | -1.108312 |
| C | 4.232295  | -3.706488 | -0.686263 |
| H | 3.829018  | -3.347718 | 1.386643  |
| C | 4.450443  | -3.136136 | -1.936636 |
| H | 4.583763  | -1.311715 | -3.067238 |
| H | 4.202251  | -4.782972 | -0.576555 |
| H | 4.583361  | -3.773161 | -2.802165 |
| C | 3.118491  | 1.399148  | 3.26724   |
| H | 2.342128  | 1.758004  | 2.582422  |
| H | 3.131679  | 2.060874  | 4.134987  |
